# Supplementary material for: Sequential versus Standard Triple Therapy for First-Line Helicobacter pylori Eradication: An Update
Source: MDPI journal article supplement (doi:10.3390/antibiotics13020136), 2024-01-30
Supplement: s1 [file s1]

## Results

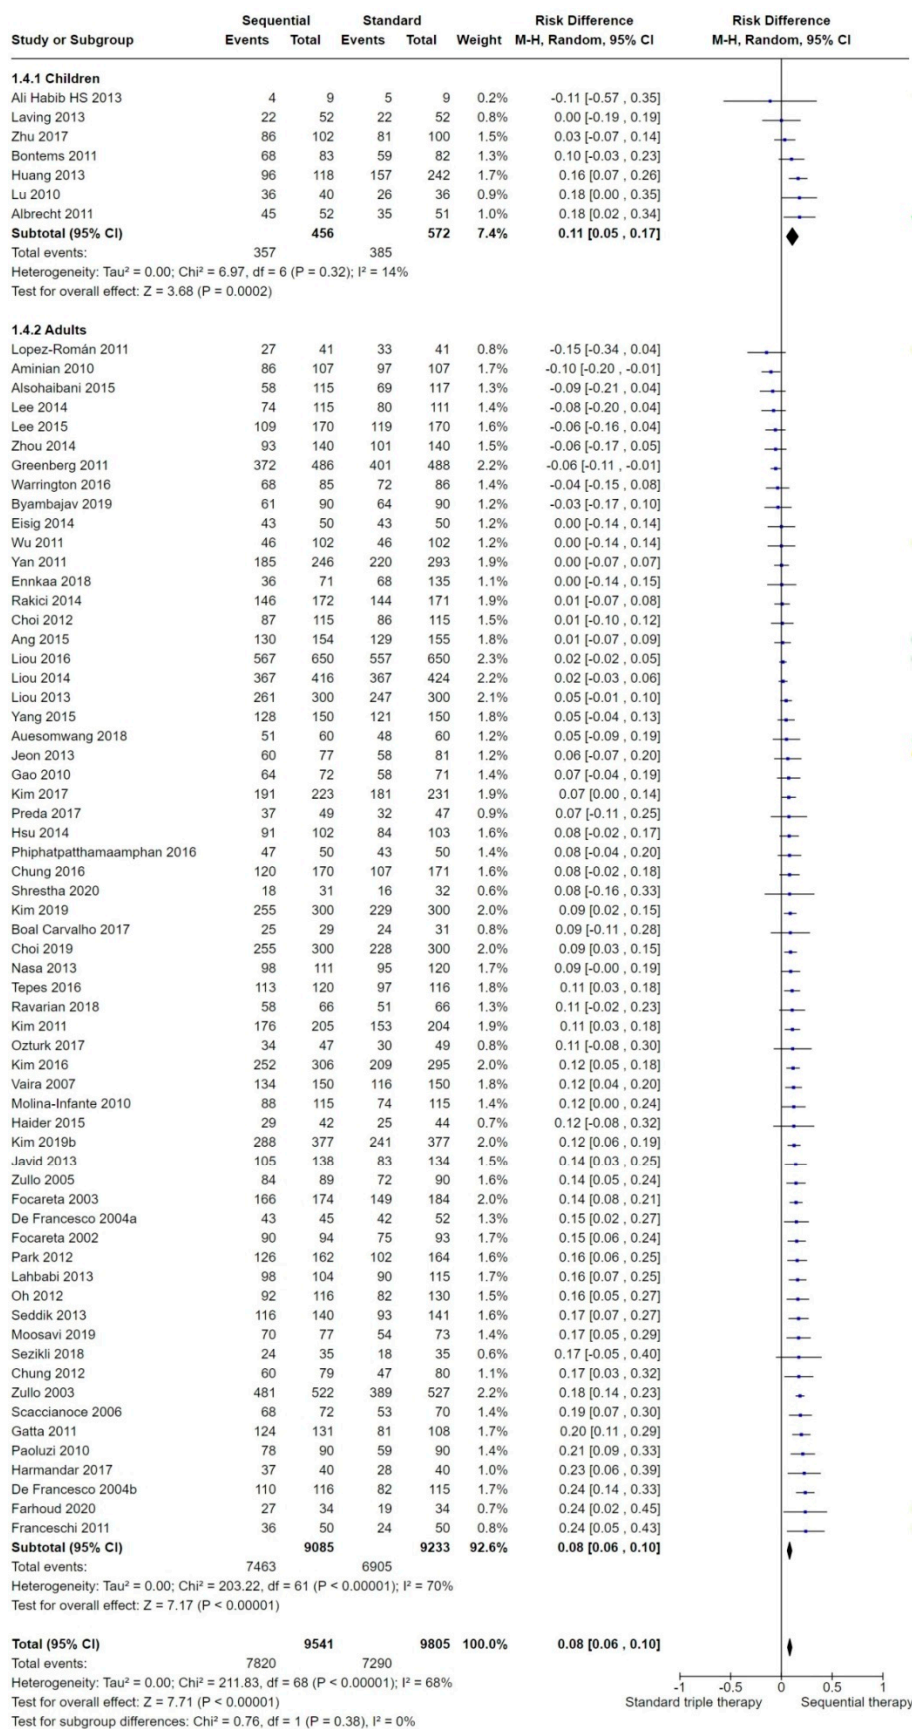

**Figure S1.** Forest plot comparison: sequential therapy versus standard triple therapy. Age of the population. M-H: Mantel-Haenszel; CI: confidence interval. Risk of bias legend: A: random sequence generation (selection bias); B: allocation concealment (selection bias); C: selective reporting (reporting bias).

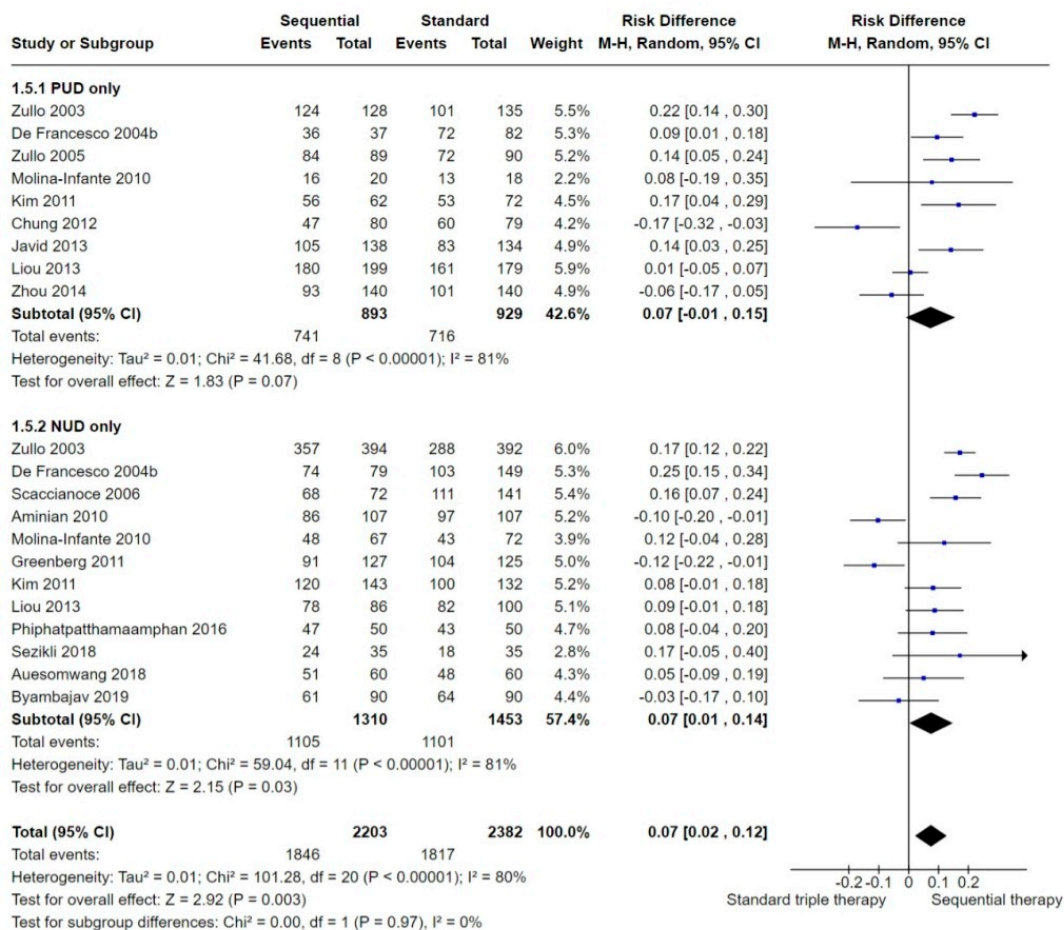

**Figure S2.** Forest plot comparison: sequential therapy versus standard triple therapy. Medical condition. M-H: Mantel-Haenszel; CI: confidence interval.

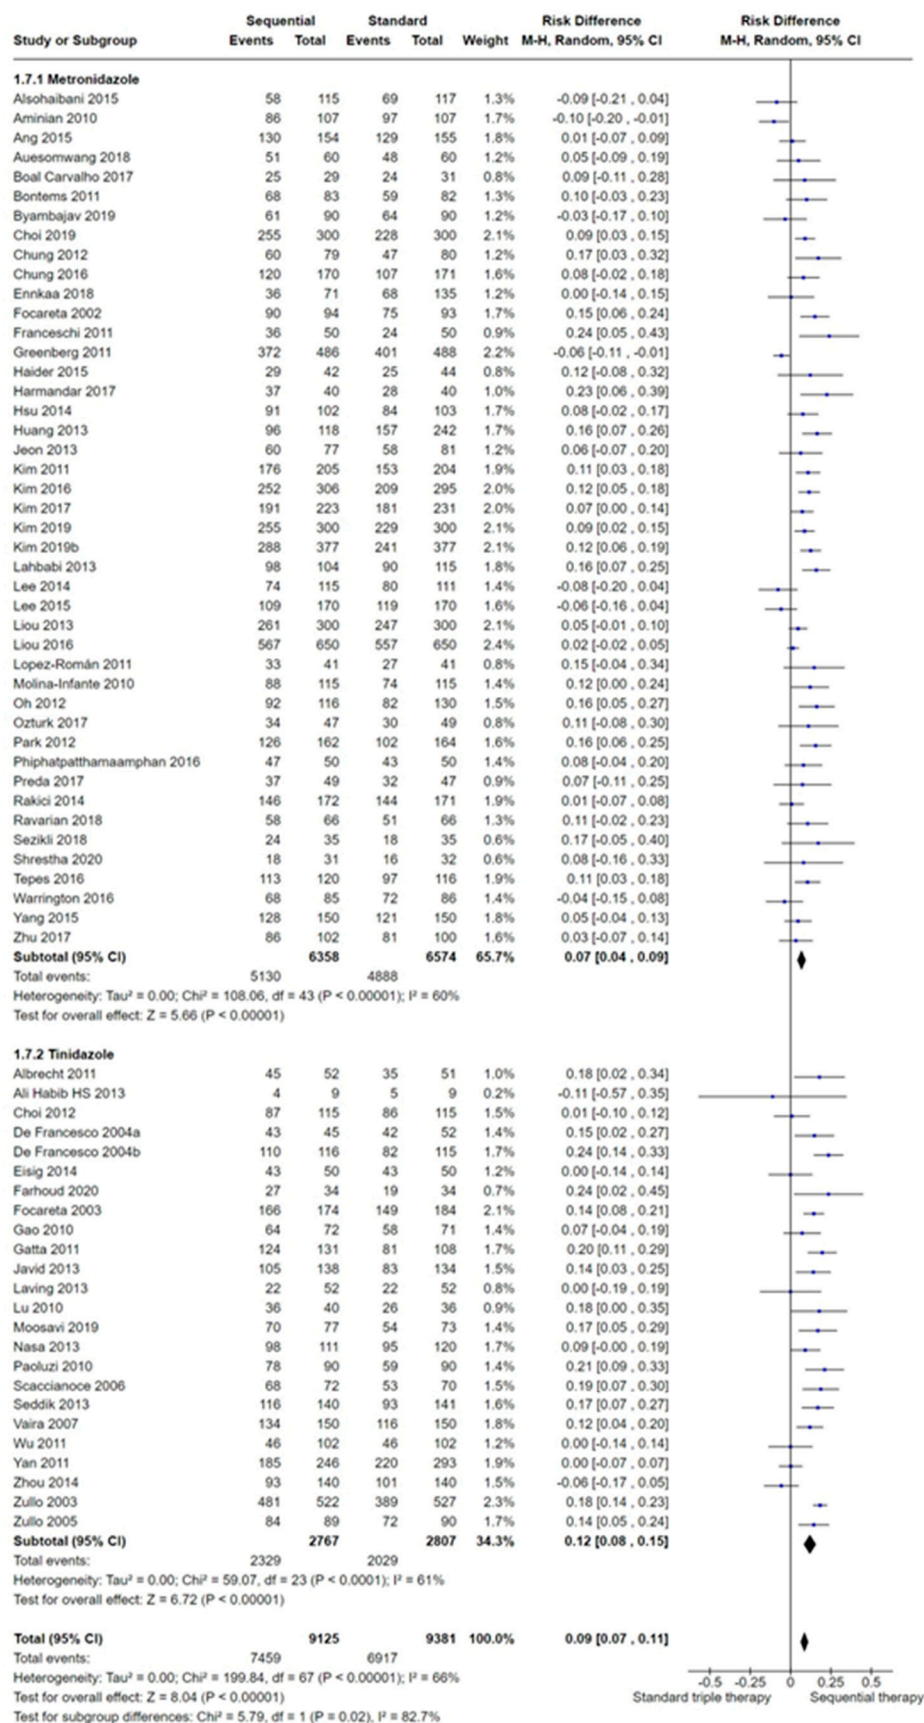

**Figure S3.** Forest plot comparison: sequential therapy versus standard triple therapy. Nitroimidazole type. M-H: Mantel-Haenszel; CI: confidence interval.



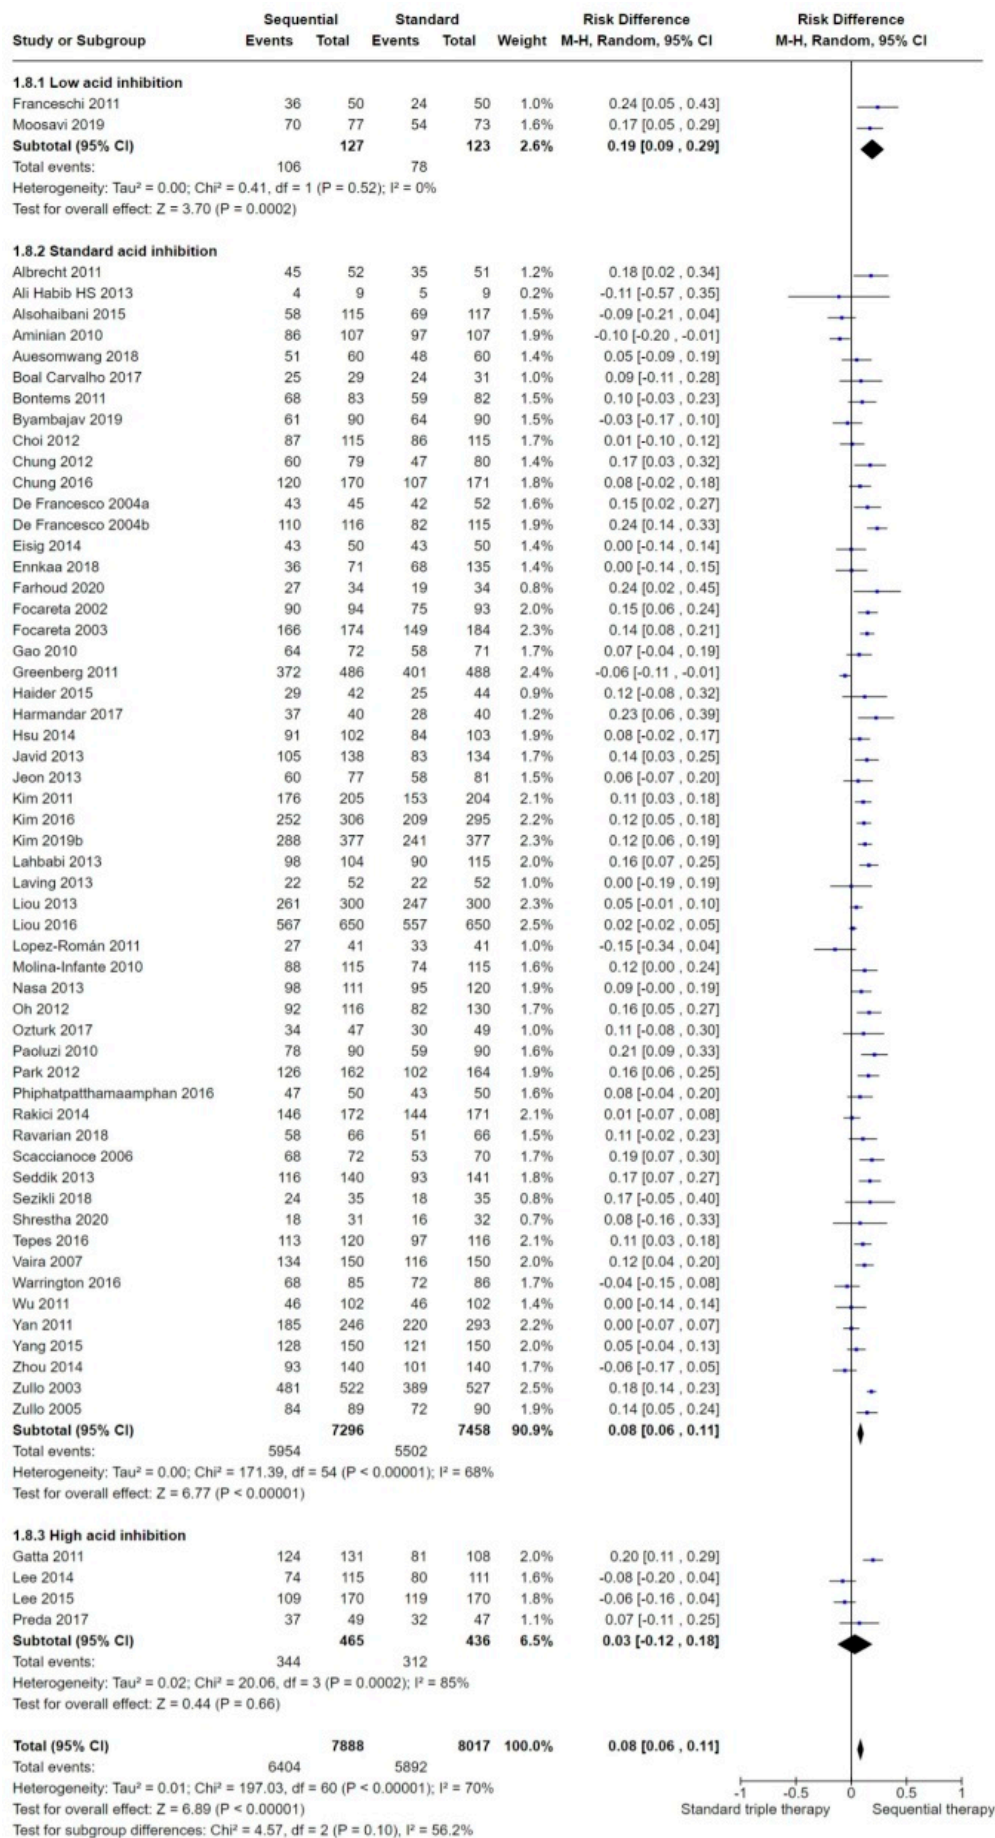

**Figure S4.** Forest plot comparison: sequential therapy versus standard triple therapy. Proton pump inhibitors for acid inhibition. M-H: Mantel-Haenszel; CI: confidence interval. Dosing for proton pump inhibitors (PPIs): low-dose PPI ranging between 4.5 and 27 mg of omeprazole equivalents, two times per day; standard-dose PPI ranging between 32 and 40 mg of omeprazole equivalents, two times per day; high-dose PPI ranging between 54 and 128 mg of omeprazole equivalents, two times per day.

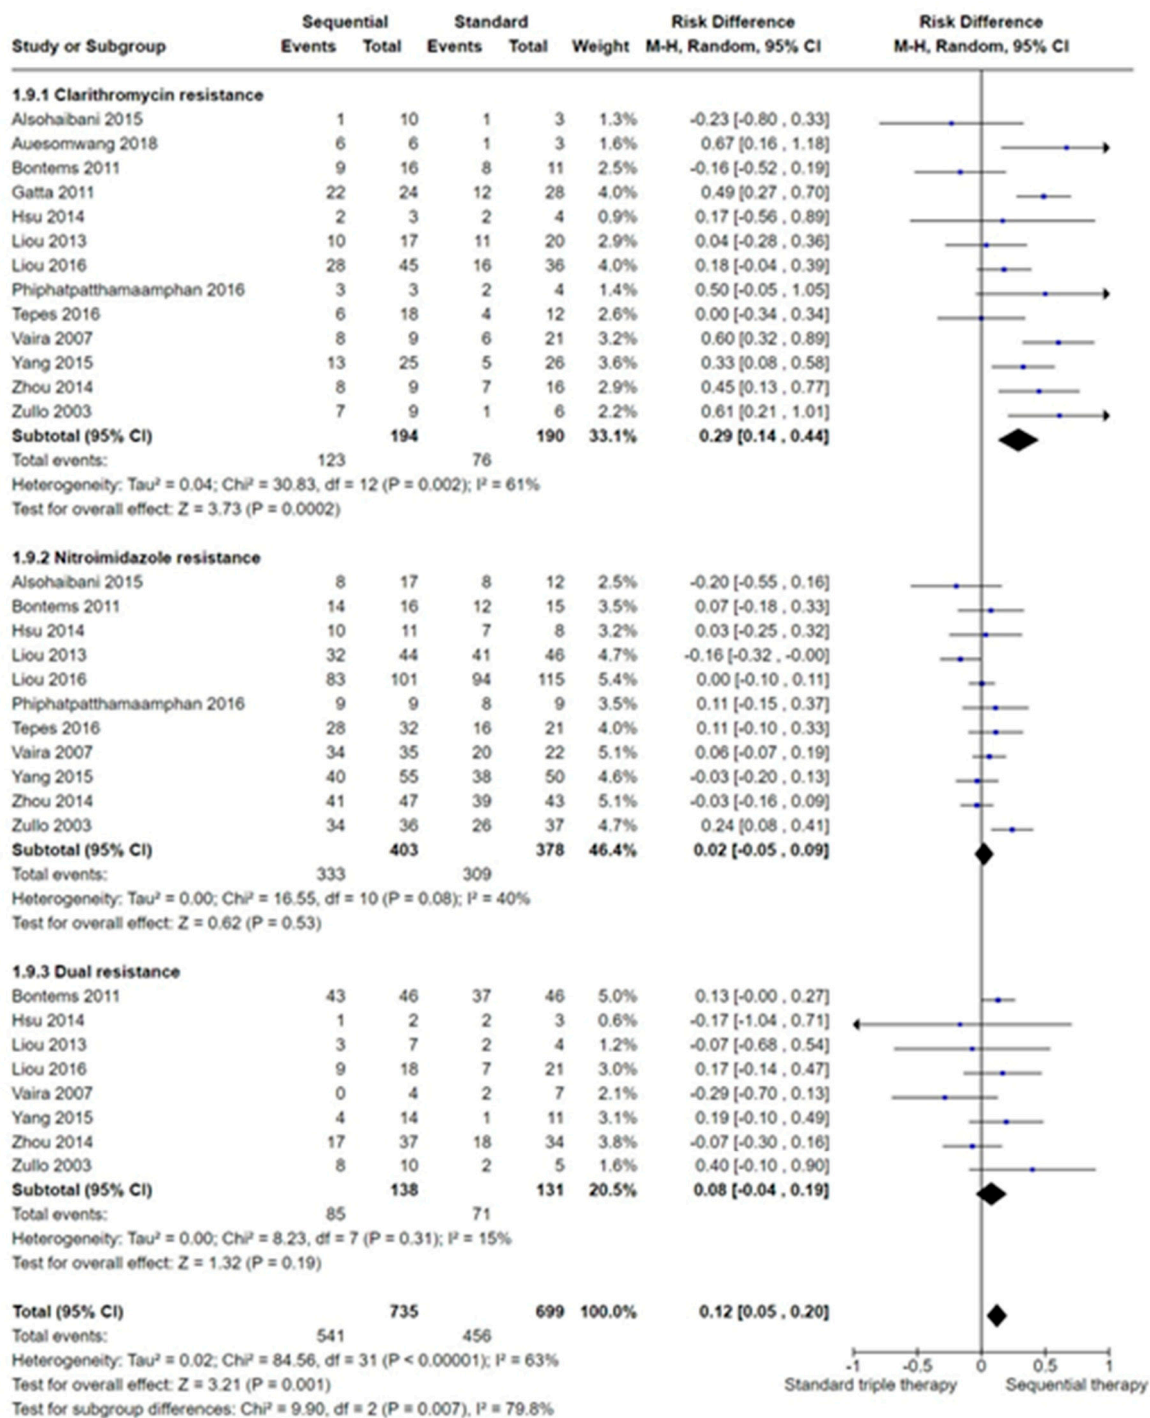

Figure S5. Forest plot comparison: sequential therapy versus standard triple therapy. Bacterial antibiotic resistance. M-H: Mantel-Haenszel; CI: confidence interval.

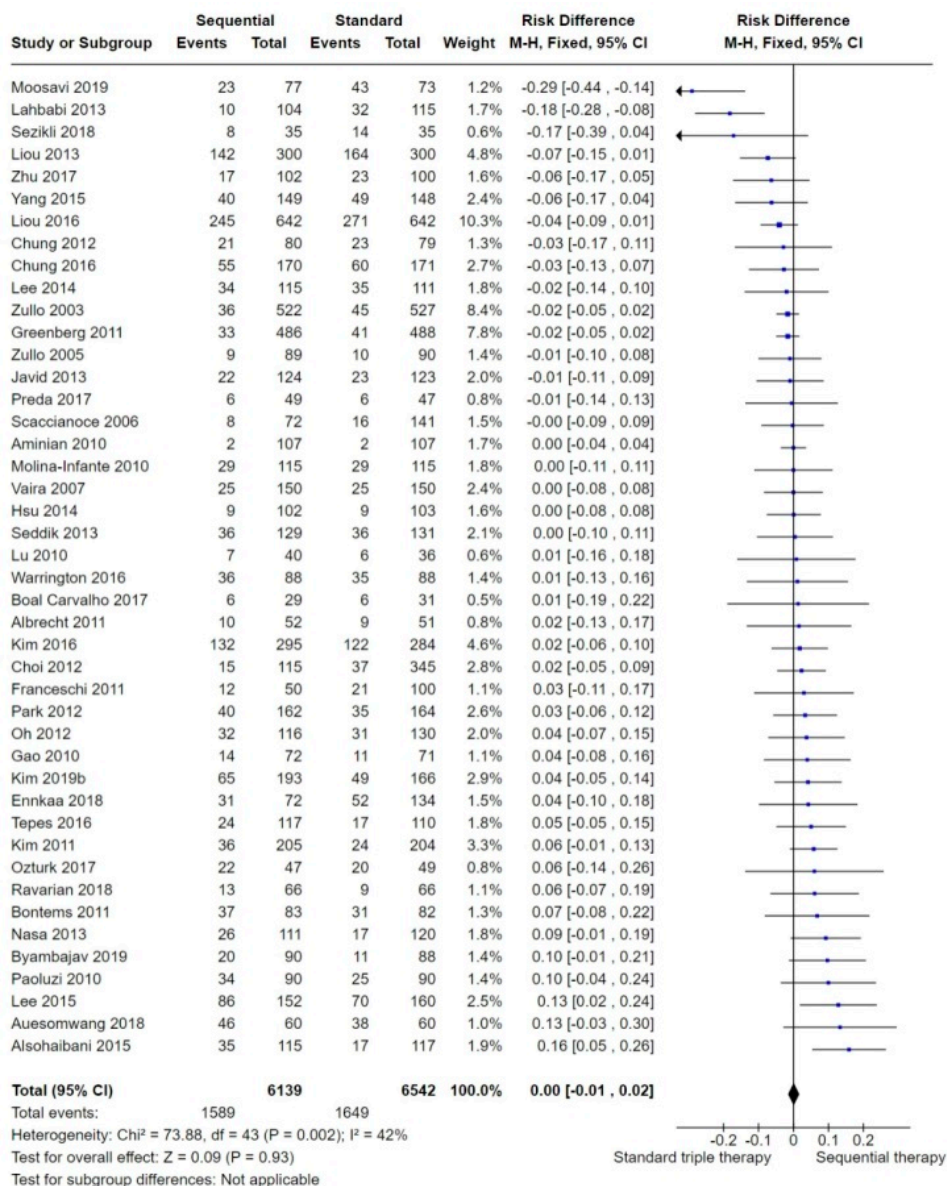

**Figure S6.** Forest plot comparison: sequential therapy versus standard triple therapy. Adverse events rate. M-H: Mantel–Haenszel; CI: confidence interval.

**Table S1.** Characteristics of included studies.

| First author      | Year | Country      | Age (children/ adults) | <i>H. pylori</i> diagnostic method | STT regimen (name; dose and timing of antibiotic administration) | Length of STT | ITT eradication rate n/N (%) (95% CI) for STT regimen | PP eradication rate n/N (%) (95% CI) for STT regimen | Incidence of AEs n/N (%) for STT regimen | Compliance for STT regimen (%) | SEQ regimen (name; dose and timing of antibiotic administration)                          | ITT eradication rate n/N (%) (95% CI) for SEQ regimen | PP eradication rate n/N (%) (95% CI) for SEQ regimen | Incidence of AEs n/N (%) for SEQ regimen | Compliance for STT regimen (%) | Method and time of assessment of <i>H. pylori</i> after treatment | PPI dose (standard, low or high) | Nitroimidazole type |
|-------------------|------|--------------|------------------------|------------------------------------|------------------------------------------------------------------|---------------|-------------------------------------------------------|------------------------------------------------------|------------------------------------------|--------------------------------|-------------------------------------------------------------------------------------------|-------------------------------------------------------|------------------------------------------------------|------------------------------------------|--------------------------------|-------------------------------------------------------------------|----------------------------------|---------------------|
| Albrecht [88]     | 2011 | Poland       | Children               | UBT, histopathology and RUT        | O 20 mg, C 500 mg and A 1000 mg b.i.d + placebo 3d               | 7 days        | 35/51 (68.6) (54 to 80)                               | NA                                                   | 9/51 (17.6)                              | > 95                           | O 20 mg and A 1000 mg b.i.d for 5 days + O 20 mg, C 500 mg, and T 500 mg b.i.d for 5 days | 45/52 (86.5) (74 to 94)                               | NA                                                   | 10/52 (19.2)                             | > 95                           | UBT 6-8 weeks                                                     | standard                         | T                   |
| Ali Habib HS [86] | 2013 | Saudi Arabia | Children               | Histopathology                     | R 20 mg, C 250 mg and A 500 mg b.i.d                             | 10 days       | 5/9 (55.6)                                            | 5/9 (55.6)                                           | NA                                       | > 95                           | R 20 mg and A 500 mg b.i.d for 5 days + R 20 mg, C 250 mg and T 500 mg b.i.d for 5 days   | 4/9 (44.4)                                            | 4/7 (57.1)                                           | NA                                       | 77                             | UBT 6 weeks                                                       | standard                         | T                   |
| Alsohaibani [85]  | 2015 | Saudi Arabia | Adults                 | UBT, histopathology and RUT        | E 20 mg, C 500 mg and A 1000 mg b.i.d                            | 14 days       | 58/115 (50.4)                                         | 58/93 (62.4)                                         | 35/115 (30.4)                            | NA                             | E 20 mg, and A 1000mg b.i.d for 5 days + O 20 mg, C 500 mg and M 500 mg b.i.d for 5 days  | 69/117 (59)                                           | 69/102 (67.6)                                        | 17/117 (14.5)                            | NA                             | UBT 6 weeks                                                       | standard                         | M                   |
| Aminian [71]      | 2010 | Iran         | Adults                 | Histopathology                     | O 20 mg, C 500 mg and A 1000 mg b.i.d                            | 10 days       | 97/107 (90.7)                                         | 97/107 (90.7)                                        | 2/107 (1.9)                              | 100                            | O 20 mg and A 1000mg b.i.d for 5 days + O 20 mg, C 500 mg                                 | 86/107 (80.4)                                         | 86/106 (81.1)                                        | 2/107 (1.9)                              | 100                            | SAT 8 weeks                                                       | standard                         | M                   |

|                    |      |                           |          |                             |                                       |         |                        |                        |              |      |                                                                                          |                        |                        |              |      |               |          |   |
|--------------------|------|---------------------------|----------|-----------------------------|---------------------------------------|---------|------------------------|------------------------|--------------|------|------------------------------------------------------------------------------------------|------------------------|------------------------|--------------|------|---------------|----------|---|
|                    |      |                           |          |                             |                                       |         |                        |                        |              |      | and M 500 mg b.i.d for 5 days                                                            |                        |                        |              |      |               |          |   |
| Ang [94]           | 2015 | Singapore                 | Adults   | UBT, histopathology and RUT | PPI, C 500 mg and A 1000 mg b.i.d     | 10 days | 129/155 (83.2 to 88.3) | 129/139 (92.8 to 96.1) | NA           | 99.3 | PPI and A 1000mg b.i.d for 5 days + PPI, C 500 mg and M 500 mg b.i.d for 5 days          | 130/154 (84.4 to 89.3) | 128/136 (94.1 to 97.0) | NA           | 94.4 | UBT 4 weeks   | standard | M |
| Auesomwang [82]    | 2018 | Thailand                  | Adults   | RUT                         | L 60 mg, C 500 mg and A 1000 mg b.i.d | 10 days | 48/60 (80)             | 48/59 (81.4)           | 38/60 (63.3) | 98.3 | L 60 mg and A 1000 mg b.i.d for 5 days + L 30 mg, C 500 mg and M 400 mg b.i.d for 5 days | 51/60 (85)             | 51/54 (94.4)           | 46/60 (79.3) | 93.1 | UBT 4 weeks   | standard | M |
| Boal Carvalho [98] | 2017 | Portugal                  | Adults   | Histopathology              | P 40 mg, C 500 mg and A 1000 mg b.i.d | 14 days | 24/31 (77.4)           | 23/27 (85.2)           | 30/31 (96.8) | 96.8 | P 40 mg and A 1000 mg b.i.d for 5 days + O 20 mg, C 500 mg and M 500 mg b.i.d for 5 days | 25/29 (86.2)           | 23/27 (85.2)           | 6/29 (20.7)  | 93.1 | UBT 4-6 weeks | standard | M |
| Bontems [89]       | 2011 | Belgium, France and Italy | Children | Histopathology              | O 20 mg, C 500 mg and A 1000 mg b.i.d | 7 days  | 59/82 (71.9)           | 59/73 (80.8)           | NA           | NA   | O 20 mg and A 100 0mg b.i.d for 5 days + O 20 mg, C 500 mg and M 500 mg b.i.d for 5 days | 68/83 (81.9)           | 68/77 (88.3)           | NA           | NA   | UBT 8 weeks   | standard | M |
| Byambajav [95]     | 2019 | Mongolia                  | Adults   | SAT, histopathology and RUT | P 40 mg, C 500 mg and A 1000 mg b.i.d | 10 days | 64/90 (71.1)           | 64/88 (72.7)           | 11/88 (12.5) | 99   | P 40 mg and A 1000 mg b.i.d for 5 days + P 40 mg, C 500 mg                               | 61/90 (67.8)           | 61/89 (97.6)           | 20/90 (22.2) | 98   | SAT 4 weeks   | standard | M |



|                        |      |       |        |                |                                             |                                         |                                                                                                             |                                                                                                               |                                                                        |      |                                                                                                               |                                    |                                      |                  |      |                  |          |   |
|------------------------|------|-------|--------|----------------|---------------------------------------------|-----------------------------------------|-------------------------------------------------------------------------------------------------------------|---------------------------------------------------------------------------------------------------------------|------------------------------------------------------------------------|------|---------------------------------------------------------------------------------------------------------------|------------------------------------|--------------------------------------|------------------|------|------------------|----------|---|
|                        |      |       |        |                |                                             |                                         |                                                                                                             |                                                                                                               |                                                                        |      | and M 500<br>mg b.i.d for 5<br>days                                                                           |                                    |                                      |                  |      |                  |          |   |
| Choi [47]              | 2012 | Korea | Adults | NA             | R 20 mg, C<br>500 mg and A<br>1000 mg b.i.d | 7<br>days;<br>10<br>days;<br>14<br>days | 7-day<br>STT:<br>81/115<br>(70.4)<br>10-day<br>STT:<br>86/115<br>(74.7)<br>14-day<br>STT:<br>92/115<br>(80) | 7-day<br>STT:<br>81/107<br>(75.7)<br>10-day<br>STT:<br>86/115<br>(81.9)<br>14-day<br>STT:<br>92/109<br>(84.4) | 7-day STT:<br>11/115<br>10-day STT:<br>14/115<br>14-day STT:<br>12/115 | > 95 | R 20 mg and<br>A 1000mg<br>b.i.d for 5<br>days + R 20<br>mg, C 250 mg<br>and T 500 mg<br>b.i.d for 5<br>days  | 87/115<br>(75.6)                   | 87/106<br>(82)                       | 15/115           | > 95 | UBT<br>4 weeks   | standard | T |
| Choi [101]             | 2019 | NA    | NA     | Histopathology | PPI, C and A<br>b.i.d                       | 7<br>days                               | 228/300<br>(76.2)                                                                                           | NA                                                                                                            | NA                                                                     | NA   | R and A b.i.d<br>for 5 days +<br>PPI, C and M<br>for 5 days                                                   | 255/300<br>(85.1)                  | NA                                   | NA               | NA   | UBT<br>6 weeks   | standard | M |
| Chung [48]             | 2012 | Korea | Adults | NA             | L 30 mg, C<br>500 mg and A<br>1000 mg b.i.d | 10<br>days                              | 47/80<br>(58.7)<br>(47.9 to<br>69.5)                                                                        | 46/68<br>(67.6)<br>(56.5 to<br>78.7)                                                                          | 21/80 (26.3)                                                           | 96.2 | L 30 mg and<br>A 1000 mg<br>b.i.d for 5<br>days + E 30<br>mg, C 500 mg<br>and M 500<br>mg b.i.d for 5<br>days | 60/79<br>(76)<br>(66.5 to<br>85.3) | 59/68<br>(86.8)<br>(78.7 to<br>94.8) | 23/79<br>(29.1)  | 96.2 | UBT<br>4-6 weeks | standard | M |
| Chung [54]             | 2016 | Korea | Adults | Histopathology | P 40 mg, C<br>500 mg and A<br>1000 mg b.i.d | 10<br>days                              | 107/171<br>(62.6)                                                                                           | 106/128<br>(82.8)                                                                                             | 60/171 (35.1)                                                          | 96.5 | P 40 mg and<br>A 1000mg<br>b.i.d for 5<br>days + P 40<br>mg, C 500 mg<br>and M 500<br>mg b.i.d for 5<br>days  | 120/170<br>(70.6)                  | 119/133<br>(89.5)                    | 55/170<br>(32.4) | 99.4 | UBT<br>4 weeks   | standard | M |
| De Francesco a<br>[41] | 2004 | Italy | Adults | NA             | R 20 mg, C<br>500 mg and A<br>1000 mg       | 10<br>days                              | 42/52<br>(80.7)                                                                                             | 42/51<br>(82.3)                                                                                               | NA                                                                     | NA   | R 20 mg and<br>A 1000 mg<br>b.i.d for 5<br>days + R 20                                                        | 43/45<br>(95.5)                    | 43/44<br>(97.7)                      | NA               | NA   | UBT<br>6-8 weeks | standard | T |

|                        |      |        |        |                           |                                             |                           |                                                                                                                  |                                                                                                                  |                                           |                             |                                                                                                               |                                      |                                      |                 |                             |                |          |   |
|------------------------|------|--------|--------|---------------------------|---------------------------------------------|---------------------------|------------------------------------------------------------------------------------------------------------------|------------------------------------------------------------------------------------------------------------------|-------------------------------------------|-----------------------------|---------------------------------------------------------------------------------------------------------------|--------------------------------------|--------------------------------------|-----------------|-----------------------------|----------------|----------|---|
|                        |      |        |        |                           |                                             |                           |                                                                                                                  |                                                                                                                  |                                           |                             | mg, C 250 mg<br>and T 500 mg<br>b.i.d for 5<br>days                                                           |                                      |                                      |                 |                             |                |          |   |
| De Francesco b<br>[35] | 2004 | Italy  | Adults | NA                        | R 20 mg, C<br>500 mg and A<br>1000 mg       | 7<br>days;<br>10<br>days, | 7-day<br>STT:<br>82/115<br>(71.3)<br>10-day<br>STT:<br>93/116<br>(80.1)                                          | 7-day<br>STT:<br>82/114<br>(71.9)<br>10-day<br>STT:<br>93/113<br>(82.3)                                          | 7-day STT:<br>(6)<br>10-day STT:<br>(7.7) | NA                          | R 20 mg and<br>A 1000mg<br>b.i.d for 5<br>days + R 20<br>mg, C 250 mg<br>and T 500 mg<br>b.i.d for 5<br>days  | 110/116<br>(94.8)                    | 110/115<br>(65.6)                    | (10.3)          | NA                          | NA             | standard | T |
| Eisig [102]            | 2014 | Brazil | Adults | Histopathology<br>and RUT | L 30 mg, C<br>500 mg and A<br>1000 mg b.i.d | 10<br>days                | 43/50<br>(86)                                                                                                    | 43/49<br>(87.7)                                                                                                  | NA                                        | NA                          | L 30 mg and<br>A 1000mg<br>b.i.d for 5<br>days + E 30<br>mg, C 500 mg<br>and T 500 mg<br>b.i.d for 5<br>days  | 43/50<br>(86)                        | 43/48<br>(89.6)                      | NA              | NA                          | UBT<br>4 weeks | standard | T |
| Ennkaa [80]            | 2018 | Turkey | Adults | RUT                       | P 40 mg, C<br>500 mg and A<br>1000 mg b.i.d | 10<br>days;<br>14<br>days | 10-day<br>STT:<br>28/62<br>(45.0)<br>(32.6 to<br>57.4)<br>14-day<br>STT:<br>40/73<br>(54.8)<br>(43.6 to<br>66.4) | 10-day<br>STT:<br>28/43<br>(65.1)<br>(50.7 to<br>79.3)<br>14-day<br>STT:<br>40/58<br>(69.0)<br>(57.1 to<br>80.9) | 10-day STT:<br>23/62 (37.1)               | NA                          | P 40 mg and<br>A 1000 mg<br>b.i.d for 5<br>days + P 40<br>mg, C 500 mg<br>and M 500<br>mg b.i.d for 5<br>days | 36/71<br>(50.7)<br>(39.1 to<br>62.3) | 36/51<br>(70.6)<br>(58.1 to<br>83.1) | 31/71<br>(43.7) | NA                          | SAT<br>4 weeks | standard | T |
| Farhoud [96]           | 2020 | Egypt  | Adults | RUT and UBT               | L 30 mg, C<br>500 mg and A<br>1000 mg b.i.d | 14<br>days                | 19/34<br>(55.9)                                                                                                  | 19/30<br>(63.3)                                                                                                  | NA                                        | reported<br>as<br>excellent | L 30 mg and<br>A 1000 mg<br>b.i.d for 5<br>days + L 15<br>mg, C 500 mg<br>and T 500 mg<br>b.i.d for 5<br>days | 27/34<br>(79.4)                      | 27/30<br>(90.0)                      | NA              | reported<br>as<br>excellent | UBT<br>6 weeks | standard | T |

|                 |      |       |        |                             |                                                                                                                    |        |                                                          |                                                          |                                                          |       |                                                                                          |                |                             |               |       |                                  |          |   |
|-----------------|------|-------|--------|-----------------------------|--------------------------------------------------------------------------------------------------------------------|--------|----------------------------------------------------------|----------------------------------------------------------|----------------------------------------------------------|-------|------------------------------------------------------------------------------------------|----------------|-----------------------------|---------------|-------|----------------------------------|----------|---|
| Focareta [37]   | 2002 | Italy | Adults | RUT                         | O 20 mg, C 500 mg and A 1000 mg b.i.d                                                                              | 7 days | 75/93 (80.6)                                             | 75/93 (80.6)                                             | NA                                                       | NA    | O 20 mg and A 1000 mg b.i.d for 5 days + O 20 mg, C 500 mg and M 500 mg b.i.d for 5 days | 90/94 (95.7)   | 90/94 (95.7)                | NA            | NA    | SAT and UBT 6 weeks              | standard | M |
| Focareta [38]   | 2003 | Italy | Adults | Histopathology and UBT      | E 20 mg, C 500 mg and A 1000 mg b.i.d                                                                              | 7 days | 149/184 (80.9)                                           | NA                                                       | NA                                                       | NA    | E 20 mg and A 1000 mg b.i.d for 5 days + O 20 mg, C 500 mg and T 500 mg b.i.d for 5 days | 166/174 (95.4) | NA                          | NA            | NA    | SAT and UBT 6 weeks              | standard | T |
| Franceschi [45] | 2011 | Italy | Adults | UBT                         | 7-day STT: L 15 mg, C 500 mg and A 1000 mg b.i.d<br>High-dose 7-day STT: L 15 mg, C 500 mg and A 1000 mg and t.i.d | 7 days | 7-day STT: 24/50 (48)<br>High-dose 7-day STT: 36/50 (72) | 7-day STT: 25/50 (50)<br>High-dose 7-day STT: 37/50 (74) | 7-day STT: 10/50 (20)<br>High-dose 7-day STT: 11/50 (22) | NA    | L 15 mg and A 1000 mg b.i.d for 5 days + L 15 mg, C 500 mg and T 500 mg b.i.d for 5 days | 36/50 (72)     | 37/50 (74)                  | 12/50 (24)    | NA    | UBT 6 weeks                      | low      | T |
| Gao [58]        | 2010 | China | Adults | NA                          | O 20 mg, C 500 mg and A 1000 mg b.i.d                                                                              | 7 days | 58/71 (80.56)                                            | 45/53 (84.91)                                            | 11/71 (15.49)                                            | > 95% | O 20 mg and A 1000 mg b.i.d for 5 days + O 20 mg, C 500 mg and T 500 mg b.i.d for 5 days | 64/72 (88.89)  | 55/61 (90.16)               | 14/72 (19.44) | > 95% | UBT, histology and RUT 4-6 weeks | standard | T |
| Gatta [31]      | 2011 | Italy | Adults | RUT, histopathology and UBT | E 40 mg, C 500 mg and A 1000 mg b.i.d                                                                              | 7 days | 28/108 (26)                                              | 12/28 (44.4) (27.6 to 62.7)                              | NA                                                       | NA    | E 40 mg and A 1000 mg b.i.d for 5 days + O 20 mg, C 500 mg and T 500 mg                  | 24/131 (18)    | 22/24 (90.9) (72.2 to 97.5) | NA            | NA    | UBT 4 weeks                      | high     | T |

|                |      |                                                                         |          |                                 |                                                   |                    |                               |                              |                           |               |                                                                                          |                               |                               |                           |      |                                                  |          |   |
|----------------|------|-------------------------------------------------------------------------|----------|---------------------------------|---------------------------------------------------|--------------------|-------------------------------|------------------------------|---------------------------|---------------|------------------------------------------------------------------------------------------|-------------------------------|-------------------------------|---------------------------|------|--------------------------------------------------|----------|---|
|                |      |                                                                         |          |                                 |                                                   |                    |                               |                              |                           |               | b.i.d for 5 days                                                                         |                               |                               |                           |      |                                                  |          |   |
| Greenberg [87] | 2011 | Chile, Colombi<br>a, Costa Rica, Mexico, Nicaragu<br>a and Hondura<br>s | Adults   | UBT                             | L 30 mg, C 500 mg and A 1000 mg b.i.d             | 14 days            | 401/488 (82.2) (78.5 to 85.5) | 401/475 (84.4)               | 41/ 475 (9)               | 87.1          | L 30 mg and A 1000 mg b.i.d for 5 days + L 15 mg, C 500 mg and T 500 mg b.i.d for 5 days | 372/488 (76.5) (72.5 to 80.2) | 372/488 (76.2)                | 33/470 (7)                | 81.1 | UBT NA                                           | standard | T |
| Haider [99]    | 2015 | Ireland                                                                 | Adults   | UBT                             | O 20 mg, C 500 mg and A 1000 mg b.i.d             | 7 days             | 25/44 (56.8)                  | 25/41 (61.0)                 | NA                        | 97.7          | O 20 mg and A 1000mg b.i.d for 5 days + O 20 mg, C 500 mg and M 500 mg b.i.d for 5 days  | 29/42 (69.0)                  | 29/42 (69.0)                  | NA                        | 100  | UBT 8 weeks                                      | standard | M |
| Harmandar [77] | 2017 | Turkey                                                                  | Adults   | Histopathology                  | P 40 mg, C 500 mg and A 1000 mg b.i.d             | 14 days            | 28/40 (70.0)                  | NA                           | NA                        | NA            | P 40 mg and A 1000 mg b.i.d for 5 days + P 40 mg, C 500 mg and M 500 mg b.i.d for 5 days | 37/40 (92.5)                  | NA                            | NA                        | NA   | UBT 4 weeks                                      | standard | M |
| Hsu [93]       | 2014 | Japan                                                                   | Adults   | RUT, histopathology or culture  | P 40 mg, C 500 mg and A 1000 mg b.i.d             | 7 days             | 84/103 (81.6) (74.1 to 89.0)  | 83/101 (82.2) (74.8 to 89.6) | 9/103 (8.7) (3.3 to 14.2) | 99            | P 40 mg and A 1000 mg b.i.d for 5 days + P 40 mg, C 500 mg and M 500 mg b.i.d for 5 days | 91/102 (89.2) (83.2 to 95.2)  | 90/100 (90.0) (84.1 to 95.9)  | 9/102 (8.8) (3.3 to 14.3) | 98   | RUT, histopathol<br>ogy, culture and UBT 6 weeks | standard | M |
| Huang [62]     | 2013 | China                                                                   | Children | RUT, SAT, culture and histology | O 0.8 – 1.0 mg/kg/d + C 20 mg/kg/d + A 30 mg/kg/d | 7 days;<br>10 days | 7-day STT: 73/118 (61.9%)     | 7-day STT: 73/103 (70.8%)    | 7-day STT: 24/103 (23.3%) | 7-day STT: NA | O 0.8 – 1.0 mg/kg/d + A 30 mg/kg/ (for 5 days)                                           | 96/118 (81.4%) (74.4 to 84.4) | 96/107 (89.7%) (83.9 to 95.5) | 32/107 (29.9%)            | NA   | STA 4 weeks                                      | standard | M |



|            |      |       |        |                        |                                       |         |                |                |                            |                |                                                                                          |                |                |                |      |                                |          |   |
|------------|------|-------|--------|------------------------|---------------------------------------|---------|----------------|----------------|----------------------------|----------------|------------------------------------------------------------------------------------------|----------------|----------------|----------------|------|--------------------------------|----------|---|
|            |      |       |        |                        |                                       |         | (53.1 to 70.7) | (62.1 to 79.7) | 10-day STT: 37/108 (34.3%) | 10-day STT: NA | and O 0.8 – 1.0 mg/kg/d + C 20 mg/kg/d + M 20 mg/kg/d (for 5 days)                       |                |                |                |      |                                |          |   |
| Javid [67] | 2013 | India | Adults | RUT and histology      | P 40 mg, C 500 mg and A 1000 mg b.i.d | 10 days | 83/134 (61.9)  | 83/123 (67.4)  | 23/123 (18.7)              | >95%           | P 40 mg and A 1000 mg b.i.d for 5 days + P 40 mg, C 500 mg and T 500 mg b.i.d for 5 days | 105/138 (76)   | 105/124 (84.6) | 22/124 (17.7)  | 100  | Histology and RUT 4 weeks      | standard | T |
| Jeon [146] | 2013 | Korea | Adults | NA                     | O 20 mg, C 500 mg and A 1000 mg b.i.d | 7 days  | 58/81 (71.6)   | 58/76 (76.6)   | NA                         | NA             | O 20 mg and A 1000 mg b.i.d for 5 days + P 40 mg, C 500 mg and M 500 mg b.i.d for 5 days | 60/77 (77.9)   | 60/70 (85.7)   | NA             | NA   | NA 8 weeks                     | standard | M |
| Kim [46]   | 2011 | Korea | Adults | UBT, RUT and histology | P 40 mg, C 500 mg and A 1000 mg b.i.d | 14 days | 153/205 (75)   | 153/180 (85)   | 24/180 (13.3)              | 97.2           | P 40 mg and A 1000 mg b.i.d for 5 days + P 40 mg, C 500 mg and M 500 mg b.i.d for 5 days | 176/205 (85.9) | 175/190 (92.6) | 36/190 (18.9)  | 96.8 | UBT, RUT and histology 4 weeks | standard | M |
| Kim [55]   | 2016 | Korea | Adults | RUT and histology      | L 30 mg, C 500 mg and A 1000 mg b.i.d | 7 days  | 209/295 (70.8) | 206/268 (76.9) | 122/295 (43.0)             | 98.5           | L 30 mg and A 100 0mg b.i.d for 5 days + L 30 mg, C 500 mg and M 500                     | 252/306 (82.4) | 247/278 (88.8) | 132/306 (44.4) | 97.2 | UBT 4 weeks                    | standard | M |

|              |      |         |          |                        |                                       |         |                |                |                |      |                                                                                                      |                |               |               |      |                          |          |   |
|--------------|------|---------|----------|------------------------|---------------------------------------|---------|----------------|----------------|----------------|------|------------------------------------------------------------------------------------------------------|----------------|---------------|---------------|------|--------------------------|----------|---|
|              |      |         |          |                        |                                       |         |                |                |                |      | mg b.i.d for 5 days                                                                                  |                |               |               |      |                          |          |   |
| Kim [104]    | 2017 | NA      | Adults   | Histology              | PPI, C and A b.i.d                    | 7 days  | 181/231 (78.3) | NA             | NA             | NA   | R and A b.i.d for 5 days + R, C and M b.i.d for 5 days                                               | 191/223 (85.7) | NA            | NA            | NA   | UBT 6 weeks              | NA       | M |
| Kim [56]     | 2019 | Korea   | Adults   | Histology              | PPI, C and A b.i.d                    | 7 days  | 229/300 (76.2) | NA             | NA             | NA   | R and A b.i.d for 5 days + R, C and M b.i.d for 5 days                                               | 255/300 (85.1) | NA            | NA            | NA   | UBT 6 weeks              | NA       | M |
| Kim b [57]   | 2019 | Korea   | Adults   | UBT, RUT and histology | L 30 mg, C 500 mg, A 1000 mg, b.i.d   | 7 days  | 241/377 (63.9) | 215/301 (71.4) | 215/301 (71.4) | 91   | L 30 mg and A 1000 mg b.i.d for 5 days + L 30 mg, C 500 mg and M 500 mg b.i.d for 5 days             | 288/377 (76.4) | 244/287 (85)  | 65/193 (33.4) | 88   | UBT 4-6 weeks            | standard | M |
| Lahbabi [69] | 2013 | Morocco | Adults   | Histology and/or STA   | O 20 mg, C 500 mg and A 1000 mg b.i.d | 7 days  | 90/115 (78.2)  | 90/113 (79.6)  | 32/115 (827.8) | 92.2 | O 20 mg and A 1000 mg b.i.d for 5 days + P 40 mg, C 500 mg and M 500 mg b.i.d for 5 days             | 98/104 (94.2)  | 98/102 (96.1) | 10/104 (9.6)  | 96.1 | UBT 12 weeks             | standard | M |
| Laving [91]  | 2013 | Kenya   | Children | Histology and/or STA   | P 40 mg, C 500 mg and A 1000 mg b.i.d | 10 days | 22/52 (42.3)   | 22/45 (48.8)   | NA             | NA   | O 1.0 mg/kg/d + A 50 mg/kg/ for 5 days and O 0.8 – 1.0 mg/kg/d + C 20 mg/kg/d + T mg/kg/d for 5 days | 22/52 (42.3)   | 22/26 (84.6)  | NA            | NA   | Histology or SAT 6 weeks | standard | T |

|           |      |        |        |                                                                 |                                       |         |                               |                               |                |    |                                                                                          |                               |                               |                |    |                           |          |    |
|-----------|------|--------|--------|-----------------------------------------------------------------|---------------------------------------|---------|-------------------------------|-------------------------------|----------------|----|------------------------------------------------------------------------------------------|-------------------------------|-------------------------------|----------------|----|---------------------------|----------|----|
| Lee [52]  | 2014 | Korea  | Adults | UBT and/or RUT                                                  | E 40 mg, C 500 mg and A 1000 mg b.i.d | 7 days  | 74/115 (64.3)                 | 74/108 (68.5)                 | 34/115 (29.5)  | NA | E 40 mg and A 1000 mg b.i.d for 5 days + P 40 mg, C 500 mg and M 500 mg b.i.d for 5 days | 80/111 (72.1)                 | 80/102 (78.4)                 | 35/111 (31.5)  | NA | Histology, UBT and/or RUT | high     | M  |
| Lee [147] | 2015 |        | Adults | Histology                                                       | R 40 mg, C 500 mg and A 1000 mg b.i.d | 7 days  | 109/170 (64)                  | 109/143 (76.2)                | 86/152 (50.6)  | NA | R 40 mg and A 1000 mg b.i.d for 5 days + R 40 mg, C 500 mg and M 500 mg b.i.d for 5 days | 119/170 (70)                  | 119/141 (84)                  | 70/160 (41.2)  | NA | UBT 6 weeks               | high     | M  |
| Liou [63] | 2013 | China  | Adults | Serology, RUT, histology, culture and UBT (at least 2 positive) | L 30 mg, C 500 mg and A 1000 mg b.i.d | 14 days | 247/300 (82.3) (78.0 to 86.6) | 243/279 (87.1) (83.2 to 91.0) | 164/298 (55)   | 87 | L 30 mg and A 1000 mg b.i.d for 5 days + L 30 mg, C 500 mg and M 500 mg b.i.d for 5 days | 261/300 (87.0) (83.2 to 90.8) | 258/285 (90.5) (87.1 to 93.9) | 142/294 (48)/  | 91 | UBT 6 weeks               | standard | M  |
| Liou [66] | 2014 | China  | Adults | Serology, RUT, histology, culture and UBT (at least 2 positive) | NA                                    | 14 days | 367/424 (86.6)                | 367/407 (90.2)                | NA             | NA | NA                                                                                       | 367/416 (88.2)                | 367/401 (91.5)                | NA             | NA | NA                        | NA       | NA |
| Liou [83] | 2016 | Taiwan | Adults | Serology, RUT, histology, culture and UBT                       | L 30 mg, C 500 mg and A 1000 mg b.i.d | 14 days | 557/650 (85.7)                | 548/602 (91)                  | 271/642 (42.2) | 94 | L 30 mg and A 1000 mg b.i.d for 5 days + L 30 mg, C 500 mg and M 500 mg b.i.d for 5 days | 567/650 (87.2)                | 556/607 (91.6)                | 245/642 (38.2) | 96 | UBT 6 weeks               | standard | M  |

|                     |      |             |          |                        |                                                   |         |                            |                             |                                                  |    |                                                                                                             |                             |                              |                                                |    |                                 |          |   |
|---------------------|------|-------------|----------|------------------------|---------------------------------------------------|---------|----------------------------|-----------------------------|--------------------------------------------------|----|-------------------------------------------------------------------------------------------------------------|-----------------------------|------------------------------|------------------------------------------------|----|---------------------------------|----------|---|
| Lopz-Román [74]     | 2011 | Puerto Rico | Adults   | RUT and histology      | O 20 mg, C 500 mg and A 1000 mg b.i.d             | 10 days | 33/41 (80)                 | NA (84.2)                   | NA                                               | NA | O 20 mg and A 1000 mg b.i.d for 5 days + P 40 mg, C 500 mg and M 500 mg b.i.d for 5 days                    | 27/41 (65.9)                | NA (71.1)                    | NA                                             | NA | UBT 8 weeks                     | standard | M |
| Lu [59]             | 2010 | China       | Children | NA                     | O 0.8 – 1.0 mg/kg/d + C 20 mg/kg/d + A 30 mg/kg/d | 10 days | 26/36 (72.2)               | 26/33 (78.8)                | 6/36 (17)                                        | NA | O 1.0 mg/kg/d + A 50 mg/kg/ (for 5 days) and O 0.8 – 1.0 mg/kg/d + C 20 mg/kg/d + T 15 mg/kg/d (for 5 days) | 36/40 (90)                  | 36/38 (94.7)                 | 7/40 (18)                                      | NA | UBT, blood test and RUT 4 weeks | standard | T |
| Molina-Infante [36] | 2010 | Spain       | Adults   | UBT, RUT and histology | O 20 mg, C 500 mg and A 1000 mg b.i.d             | 10 days | 74/115 (64%; 55 – 73%)     | 74/113 (66%; 57 – 74%)      | 29/115 (25)                                      | 97 | O 20 mg and A 1000 mg b.i.d for 5 days + P 40 mg, C 500 mg and M 500 mg b.i.d for 5 days                    | 88/115 (76%; 69 – 85%)      | 88/110 (80%; 3 – 88%)        | 29/110 (25%)                                   | 99 | UBT and histology 8 weeks       | standard | M |
| Moosavi [73]        | 2019 | Iran        | Adults   | RUT and histology      | P 40 mg, C 500 mg and A 1000 mg b.i.d             | 14 days | 54/73 (74.0))              | 52/64 (81.3)                | Minor AEs: 36/73 (49.3)<br>Major AEs: 7/73 (9.6) | NA | P 40 mg and A 1000 mg b.i.d for 5 days + P 40 mg, C 500 mg and T 500 mg b.i.d for 5 days                    | 70/77 (90.9)                | 70/73 (95.9)                 | Minor AEs: 20/77 (26)<br>Major AEs: 3/77 (3.9) | NA | UBT 4 weeks                     | low      | T |
| Nasa [68]           | 2013 | India       | Adults   | RUT and histology      | P 40 mg, C 500 mg and A 1000 mg b.i.d             | 14 days | 95/120 (79.1) (1.1 – 85.4) | 98/120 (81.6) (73.9 – 87.8) | 17/120 (14.6)                                    | NA | P 40 mg and A 1000 mg b.i.d for 5 days + P 40 mg, C 500 mg                                                  | 98/111 (88.2) (80.9 – 93.0) | 103/111 (92.8) (85.8 – 96.1) | 26/111 (23.5)                                  | NA | RUT 4 weeks                     | standard | T |



|                                |      |          |        |                      |                                                              |            |                           |                           |               |      |                                                                                                               |                           |                           |                  |      |                                                    |          |   |
|--------------------------------|------|----------|--------|----------------------|--------------------------------------------------------------|------------|---------------------------|---------------------------|---------------|------|---------------------------------------------------------------------------------------------------------------|---------------------------|---------------------------|------------------|------|----------------------------------------------------|----------|---|
|                                |      |          |        |                      |                                                              |            |                           |                           |               |      | and T 500 mg<br>b.i.d for 5<br>days                                                                           |                           |                           |                  |      |                                                    |          |   |
| Oh [51]                        | 2012 | Korea    | Adults | SAT and<br>histology | R 20 mg, C<br>500 mg and A<br>1000 mg b.i.d                  | 7<br>days  | 82/130<br>(63.0)          | 92/116<br>(79.3)          | 32/116 (27.5) | NA   | R 20 mg and<br>A 1000 mg<br>b.i.d for 5<br>days + R 20<br>mg, C 500 mg<br>and M 500<br>mg b.i.d for 5<br>days | 82/127<br>(64.5)          | 91/111<br>(81.9)          | 31/130<br>(23.8) | NA   | UBT<br>4 weeks                                     | standard | M |
| Ozturk [78]                    | 2012 | Turkey   | Adults | RUT and<br>histology | O 20 mg, C<br>500 mg and A<br>1000 mg b.i.d                  | 10<br>days | 30/49<br>(61.2)           | 30/40<br>(75)             | 20/49 (40.8)  | NA   | O 20 mg and<br>A 1000 mg<br>b.i.d for 5<br>days + O 20<br>mg, C 500 mg<br>and M 500<br>mg b.i.d for 5<br>days | 34/47<br>(72.3)           | 30/40<br>(73.9)           | 22/47<br>(46.8)  | NA   | UBT<br>6-8 weeks                                   | standard | M |
| Paoluzi [44]                   | 2010 | Italy    | Adults | NA                   | E 20 mg, C<br>500 mg, A<br>1000 mg, b.i.d                    | 7<br>days  | 59/90<br>(66)             | 59/78<br>(75)             | 25/90 (42)    | NA   | E 20 mg and<br>A 1000 mg<br>b.i.d for 5<br>days + E 20<br>mg, C 500 mg<br>and T 500 mg<br>b.i.d for 5<br>days | 78/90<br>(86)             | 78/88<br>(88)             | 34/90<br>(54)    | NA   | Histology,<br>SAT, UBT<br>and/or<br>RUT<br>8 weeks | standard | T |
| Park [49]                      | 2012 | Korea    | Adults | UBT                  | R 20 mg, C<br>500 mg and A<br>1000 mg b.i.d                  | 7<br>days  | 62.2<br>(54.8 to<br>69.6) | 76.0<br>(68.5 to<br>83.5) | NA            | 87.9 | R 20 mg and<br>A 1000 mg<br>b.i.d for 5<br>days + R 20<br>mg, C 500 mg<br>and M 500<br>mg b.i.d for 5<br>days | 77.8<br>(71.4 to<br>84.2) | 87.9<br>(82.3 to<br>93.5) | NA               | 76.0 | UBT<br>4 weeks                                     | standard | M |
| Phiphatpatthamaa<br>mphan [81] | 2016 | Thailand | Adults | RUT                  | R 20 mg, C<br>1000 mg (long<br>acting) and A<br>500 mg q.i.d | 14<br>days | 43/50<br>(86.0)           | 47/48<br>(97.9)           | NA            | NA   | R 20 mg and<br>A 1000 mg<br>b.i.d for 5<br>days + R 20                                                        | 47/50<br>(94.0)           | 43/49<br>(87.8)           | NA               | NA   | UBT<br>4 weeks                                     | standard | M |

|                  |      |         |        |                   |                                       |                   |                                                                |                                                                |             |     |                                                                                          |                          |                          |              |     |               |          |   |
|------------------|------|---------|--------|-------------------|---------------------------------------|-------------------|----------------------------------------------------------------|----------------------------------------------------------------|-------------|-----|------------------------------------------------------------------------------------------|--------------------------|--------------------------|--------------|-----|---------------|----------|---|
|                  |      |         |        |                   |                                       |                   |                                                                |                                                                |             |     | mg, C 1000 mg (long acting) and M 500 mg q.i.d for 5 days                                |                          |                          |              |     |               |          |   |
| Preda [97]       | 2017 | Romania | Adults | SAT               | E 80 mg, C 500 mg and A 1000 mg b.i.d | 10 days           | 32/47 (68.1)                                                   | 32/34 (94.0)                                                   | 6/47        | 94  | E 80 mg and A 1000 mg b.i.d for 5 days + E 80 mg, C 500 mg and M 500 mg b.i.d for 5 days | 37/49 (75.5)             | 37/39 (95.0)             | 6/49         | 100 | SAT 4 weeks   | high     | T |
| Rakici [76]      | 2014 | Turkey  | Adults | SAT and Histology | L 30 mg, C 500 mg and A 1000 mg b.i.d | 14 days           | 144/171 (84.2)                                                 | 144/169 (85.2)                                                 | NA          | NA  | L 30 mg and A 1000 mg b.i.d for 5 days + L 30 mg, C 500 mg and M 500 mg b.i.d for 5 days | 146/172 (84.9)           | 146/170 (85.8)           | NA           | NA  | SAT 4-6 weeks | standard | M |
| Ravarian [72]    | 2018 | Iran    | Adults | RUT and histology | O 20 mg, C 500 mg and A 1000 mg b.i.d | 10 days           | 51/66 (78.0)                                                   | NA                                                             | 9/66 (13.6) | NA  | O 20 mg and A 1000 mg b.i.d for 5 days + O 20 mg, C 500 mg and M 500 mg b.i.d for 5 days | 58/66 (87.8)             | NA                       | 13/66 (19.7) | NA  | UBT 4-6 weeks | standard | M |
| Scaccianoce [42] | 2006 | Italy   | Adults | RUT and histology | E 20 mg, C 500 mg and A 1000 mg b.i.d | 7 days<br>10 days | 7-day STT: 53/70 (75.7) (66 to 86)<br>10-day STT: 58/71 (81.7) | 7-day STT: 53/68 (77.9) (68 to 88)<br>10-day STT: 58/69 (84.1) | NA          | >95 | E 20 mg and A 1000 mg b.i.d for 5 days + E 20 mg, C 500 mg and T 500 mg b.i.d for 5 days | 68/72 (94.4) (89 to 100) | 68/70 (97.1) (93 to 100) | NA           | >95 | UBT 4-6 weeks | standard | T |

|                |      |          |        |                        |                                       |         |               |               |               |     |                                                                                          |                |                |               |     |               |          |   |
|----------------|------|----------|--------|------------------------|---------------------------------------|---------|---------------|---------------|---------------|-----|------------------------------------------------------------------------------------------|----------------|----------------|---------------|-----|---------------|----------|---|
|                |      |          |        |                        |                                       |         | (73 to 91)    | (75 to 93)    |               |     |                                                                                          |                |                |               |     |               |          |   |
| Seddik [70]    | 2013 | Morocco  | Adults | Histology              | O 20 mg, C 500 mg and A 1000 mg b.i.d | 7 days  | 93/141 (66)   | 93/131 (71)   | 36/131 (27.5) | NA  | O 20 mg and A 1000 mg b.i.d for 5 days + O 20 mg, C 500 mg and M 500 mg b.i.d for 5 days | 116/140 (82.8) | 116/129 (90)   | 36/129 (27.9) | NA  | UBT 4-6 weeks | standard | M |
| Sezikli [79]   | 2018 | Turkey   | Adults | RUT and histology      | R 20 mg, C 500 mg and A 1000 mg b.i.d | 14 days | 18/35 (51.4)  | 18/35 (51.4)  | 14/35 (40)    | NA  | R 20 mg and A 1000 mg b.i.d for 5 days + R 20 mg, C 500 mg and M 500 mg b.i.d for 5 days | 24/35 (68.6)   | 24/35 (68.6)   | 8/35 (22.9)   | NA  | UBT 4-6 weeks | standard | M |
| Shrestha [100] | 2020 | Nepal    | Adults | SAT and histology      | E 20 mg, C 500 mg and A 1000 mg b.i.d | 14 days | 18/31 (58)    | NA            | NA            | 58  | E 20 mg and A 1000 mg b.i.d for 5 days + E 20 mg, C 500 mg and M 400 mg b.i.d for 5 days | 16/32 (86.5)   | NA             | NA            | 49  | SAT 5 weeks   | standard | M |
| Tepes [90]     | 2016 | Slovenia | Adults | UBT, RUT and histology | E 20 mg, C 500 mg and A 1000 mg b.i.d | 7 days  | 97/116 (83.6) | 97/110 (88.2) | 17/110 (15.5) | NA  | E 20 mg and A 1000 mg b.i.d for 5 days + E 20 mg, C 500 mg and M 400 mg b.i.d for 5 days | 113/120 (94.2) | 113/117 (96.6) | 24/117 (20.5) | NA  | UBT 4 weeks   | standard | M |
| Vaira [43]     | 2007 | Italy    | Adults | NA                     | P 40 mg, C 500 mg and A 1000 mg b.i.d | 10 days | 116/150 (77)  | 116/146 (79)  | 25/146 (17.1) | >90 | P 40 mg and A 1000 mg b.i.d for 5 days + P 40 mg, C 500 mg                               | 134/150 (89)   | 133/143 (93)   | 25/143 (17.5) | >90 | UBT 4-8 weeks | standard | T |

|                 |      |                |        |                           |                                             |            |                        |                   |               |      |                                                                                                               |                        |                   |                  |      |                                   |          |   |
|-----------------|------|----------------|--------|---------------------------|---------------------------------------------|------------|------------------------|-------------------|---------------|------|---------------------------------------------------------------------------------------------------------------|------------------------|-------------------|------------------|------|-----------------------------------|----------|---|
|                 |      |                |        |                           |                                             |            |                        |                   |               |      | and T 500 mg<br>b.i.d for 5<br>days                                                                           |                        |                   |                  |      |                                   |          |   |
| Warrington [75] | 2016 | Puerto<br>Rico | Adults | RUT and<br>histology      | O 20 mg, C<br>500 mg and A<br>1000 mg b.i.d | 10<br>days | 72/86<br>(83.7)        | 70/83<br>(84.3)   | NA            | 94.3 | O 20 mg and<br>A 1000 mg<br>b.i.d for 5<br>days + O 20<br>mg, C 500 mg<br>and M 500<br>mg b.i.d for 5<br>days | 68/85<br>(80.0)        | 66/81<br>(81.5)   | NA               | 94.3 | UBT<br>6 weeks                    | standard | M |
| Wu [60]         | 2011 | China          | Adults | NA                        | E 20 mg, C<br>500 mg and A<br>1000 mg b.i.d | 14<br>days | 46/51<br>(90.4)        | NA                | NA            | NA   | E 20 mg and<br>A 1000 mg<br>b.i.d for 5<br>days + P 40<br>mg, C 500 mg<br>and T 500 mg<br>b.i.d for 5<br>days | 46/51<br>(90.2)        | NA                | NA               | NA   | UBT or<br>endoscopy<br>4 weeks    | standard | T |
| Yan [61]        | 2011 | China          | Adults | RUT and<br>histology      | E 20 mg, C<br>500 mg and A<br>1000 mg b.i.d | 10<br>days | 185 /<br>246<br>(75.2) | NA                | NA            | NA   | E 20 mg and<br>A 1000 mg<br>b.i.d for 5<br>days + E 20<br>mg, C 500 mg<br>and T 500 mg<br>b.i.d for 5<br>days | 220 /<br>293<br>(75.1) | NA                | NA               | NA   | UBT or<br>histology<br>4-12 weeks | standard | T |
| Yang [84]       | 2015 | Taiwan         | Adults | UBT, RUT and<br>histology | R 20 mg, C<br>500 mg and A<br>1000 mg b.i.d | 7<br>days  | 121/150<br>(80.7)      | 121/149<br>(81.2) | 49/148 (33.2) | 94.9 | R 20 mg and<br>A 1000 mg<br>b.i.d for 5<br>days + R 40<br>mg, C 500 mg<br>and M 500<br>mg b.i.d for 5<br>days | 128/150<br>(85.3)      | 128/148<br>(86.5) | 40/149<br>(26.8) | 87.8 | UBT<br>4-8 weeks                  | standard | M |
| Zhou [64]       | 2014 | China          | Adults | RUT                       | E 20 mg, C<br>500 mg and A<br>1000 mg b.i.d | 10<br>days | 93/140<br>(66.4)       | 93/128<br>(72.7)  | NA            | NA   | E 20 mg and<br>A 1000 mg<br>b.i.d for 5<br>days + E 20                                                        | 101/140<br>(72.1)      | 101/132<br>(76.5) | NA               | NA   | UBT or<br>histology<br>4-12 weeks | standard | T |





Table S2. Summary of findings.

| Is 10-day SEQ efficacy superior to STT?                                       |                                          |                           |                                   |                               |                                   |                                                                                                                                                                                                                                                                                                                                                                                           |
|-------------------------------------------------------------------------------|------------------------------------------|---------------------------|-----------------------------------|-------------------------------|-----------------------------------|-------------------------------------------------------------------------------------------------------------------------------------------------------------------------------------------------------------------------------------------------------------------------------------------------------------------------------------------------------------------------------------------|
| Patient or population: participants with <i>Helicobacter pylori</i> infection |                                          |                           |                                   |                               |                                   |                                                                                                                                                                                                                                                                                                                                                                                           |
| Settings: participants naïve to eradication treatment                         |                                          |                           |                                   |                               |                                   |                                                                                                                                                                                                                                                                                                                                                                                           |
| Intervention: 10-day sequential regimen                                       |                                          |                           |                                   |                               |                                   |                                                                                                                                                                                                                                                                                                                                                                                           |
| Comparison: standard triple therapy                                           |                                          |                           |                                   |                               |                                   |                                                                                                                                                                                                                                                                                                                                                                                           |
| Outcomes                                                                      | Illustrative comparative risks* (95% CI) |                           | Relative effect (95% CI)          | No. of Participants (studies) | Quality of the evidence (GRADE)   | Comments                                                                                                                                                                                                                                                                                                                                                                                  |
|                                                                               | Assumed risk                             | Corresponding risk        |                                   |                               |                                   |                                                                                                                                                                                                                                                                                                                                                                                           |
|                                                                               | Standard triple therapy                  | 10-day sequential regimen |                                   |                               |                                   |                                                                                                                                                                                                                                                                                                                                                                                           |
|                                                                               |                                          |                           |                                   |                               |                                   |                                                                                                                                                                                                                                                                                                                                                                                           |
| Eradication proportion                                                        | Study population                         |                           | RD 0.08, 95% CI From 0.06 to 0.10 | 19,661 (69 studies)           | ⊕⊕⊕⊕<br>moderate <sup>1</sup>     | The results were highly heterogeneous ( <i>I</i> <sup>2</sup> = 68%), and 37 studies did not demonstrate differences between therapies.                                                                                                                                                                                                                                                   |
|                                                                               | 748 per 1000                             | 824 per 1000 (816 to 832) |                                   |                               |                                   |                                                                                                                                                                                                                                                                                                                                                                                           |
|                                                                               | Moderate                                 |                           |                                   |                               |                                   |                                                                                                                                                                                                                                                                                                                                                                                           |
|                                                                               | 748 per 1000                             | 824 per 1000 (816 to 832) |                                   |                               |                                   |                                                                                                                                                                                                                                                                                                                                                                                           |
| Geographic region                                                             | Study population                         |                           | RD 0.08, 95% CI From 0.06 to 0.10 | 18,746 (68 studies)           | ⊕⊕⊕⊕<br>low <sup>1,2,3</sup>      | The results were highly heterogeneous ( <i>I</i> <sup>2</sup> = 68%) with significant differences between subgroups. The Latin American subgroup showed no consistent results with the remaining subgroups and there was a tendency toward better efficacy with STT than with SEQ in all four included studies, although three studies did not demonstrate differences between therapies. |
|                                                                               | 742 per 1000                             | 818 per 1000 (810 to 826) |                                   |                               |                                   |                                                                                                                                                                                                                                                                                                                                                                                           |
|                                                                               | Moderate                                 |                           |                                   |                               |                                   |                                                                                                                                                                                                                                                                                                                                                                                           |
|                                                                               | 742 per 1000                             | 839 per 1000 (810 to 826) |                                   |                               |                                   |                                                                                                                                                                                                                                                                                                                                                                                           |
| Publication date                                                              | Study population                         |                           | RD 0.08, 95% CI From 0.06 to 0.10 | 19,813 (69 studies)           | ⊕⊕⊕⊕<br>moderate <sup>1,2,3</sup> | The results were more heterogeneous ( <i>I</i> <sup>2</sup> = 60%) in the "after 2010" subgroup.                                                                                                                                                                                                                                                                                          |
|                                                                               | 744 per 1000                             | 819 per 1000 (811 to 827) |                                   |                               |                                   |                                                                                                                                                                                                                                                                                                                                                                                           |
|                                                                               | Moderate                                 |                           |                                   |                               |                                   |                                                                                                                                                                                                                                                                                                                                                                                           |
|                                                                               | 744 per 1000                             | 819 per 1000 (811 to 827) |                                   |                               |                                   |                                                                                                                                                                                                                                                                                                                                                                                           |
| STT length                                                                    | 7 days                                   |                           | RD 0.13, 95% CI from 0.11 to 0.15 | 8,834 (29 studies)            | ⊕⊕⊕⊕<br>high <sup>4</sup>         | Eight out of twenty-nine studies did not demonstrate differences when 7-day STT was compared to 10-day SEQ. The results for this comparison were consistent ( <i>I</i> <sup>2</sup> = 41%).                                                                                                                                                                                               |
|                                                                               | Study population                         |                           |                                   |                               |                                   |                                                                                                                                                                                                                                                                                                                                                                                           |
|                                                                               | 725 per 1000                             | 870 per 1000 (848 to 892) |                                   |                               |                                   |                                                                                                                                                                                                                                                                                                                                                                                           |
|                                                                               | Moderate                                 |                           |                                   |                               |                                   |                                                                                                                                                                                                                                                                                                                                                                                           |
|                                                                               | 720 per 1000                             | 864 per 1000 (842 to 886) |                                   |                               |                                   |                                                                                                                                                                                                                                                                                                                                                                                           |
|                                                                               | 10 days                                  |                           | RD 0.06, 95% CI from 0.02 to 0.09 | 5,236 (27 studies)            | ⊕⊕⊕⊕<br>high <sup>1,4</sup>       | In this subgroup, 10-day SEQ was better than 10-day STT; however, heterogeneity between studies was greater ( <i>I</i> <sup>2</sup> =51%) than in the 7-day STT subgroup analysis. Six studies out of twenty-seven demonstrated that 10-day STT was superior to 10-day SEQ. Eighteen studies could not demonstrate differences between therapies.                                         |
|                                                                               | Study population                         |                           |                                   |                               |                                   |                                                                                                                                                                                                                                                                                                                                                                                           |
|                                                                               | 720 per 1000                             | 768 per 1000 (751 to 784) |                                   |                               |                                   |                                                                                                                                                                                                                                                                                                                                                                                           |
|                                                                               | Moderate                                 |                           |                                   |                               |                                   |                                                                                                                                                                                                                                                                                                                                                                                           |
|                                                                               | 720 per 1000                             | 750 per 1000 (744 to 823) |                                   |                               |                                   |                                                                                                                                                                                                                                                                                                                                                                                           |
|                                                                               | 14 days                                  |                           | RD 0.04, 95% CI                   | 6,300 (19 studies)            | ⊕⊕⊕⊕                              | 14-day STT was marginally not superior to 10- day SEQ.                                                                                                                                                                                                                                                                                                                                    |
|                                                                               | Study population                         |                           |                                   |                               |                                   |                                                                                                                                                                                                                                                                                                                                                                                           |

|                                 |                  |                           |                     |                                    |                                                                                               |  |
|---------------------------------|------------------|---------------------------|---------------------|------------------------------------|-----------------------------------------------------------------------------------------------|--|
|                                 | 789 per 1000     | 811 per 1000 (795 to 825) | from 0.01 to 0.07   |                                    | high <sup>1,4</sup>                                                                           |  |
|                                 | Moderate         |                           |                     |                                    |                                                                                               |  |
|                                 | 779 per 1000     | 819 per 1000 (803 to 835) |                     |                                    |                                                                                               |  |
| Bacterial antibiotic resistance | Study population |                           | RD 0.12, 1,434      | ⊕⊕⊕⊕ very low <sup>1,2,3,5,6</sup> | SEQ was superior to STT in those patients with primary clarithromycin resistant strains only. |  |
|                                 | 652 per 1000     | 736 per 1000 (703 to 768) | 95% CI (13 studies) |                                    |                                                                                               |  |
|                                 | Moderate         |                           | from 0.05 to 0.20   |                                    |                                                                                               |  |
|                                 | 550 per 1000     | 660 per 1000 (572 to 748) |                     |                                    |                                                                                               |  |
| Adverse events rate             | Study population |                           | RD 0.00, 12,681     | ⊕⊕⊕⊕ high <sup>2,7</sup>           | No differences were reported between treatment arms.                                          |  |
|                                 | 258 per 1000     | 258 per 1000 (247 to 269) | 95% CI (44 studies) |                                    |                                                                                               |  |
|                                 | Moderate         |                           | -0.01 to 0.02       |                                    |                                                                                               |  |
|                                 | 187 per 1000     | 191 per 1000 (168 to 206) |                     |                                    |                                                                                               |  |

\*The basis for the **assumed risk** (e.g. the median control group risk across studies) is provided in footnotes. The **corresponding risk** (and its 95% confidence interval) is based on the assumed risk in the comparison group and the **relative effect** of the intervention (and its 95% CI).

STT: standard triple therapy; SEQ: non-bismuth quadruple sequential therapy.

CI: confidence interval; RD: risk difference

GRADE: working group grades of evidence:

**High quality:** further research is very unlikely to change our confidence in the estimate of effect.

**Moderate quality:** further research is likely to have an important impact on our confidence in the estimate of effect and may change the estimate.

**Low quality:** further research is very likely to have an important impact on our confidence in the estimate of effect and is likely to change the estimate.

**Very low quality:** we are very uncertain about the estimate.

1: there is moderate to substantial unexplained heterogeneity.

2: wide confidence intervals in some subgroups.

3: small number of studies in some subgroups.

4: different STT lengths (different total doses) modify RDs.

5: lack of reporting in most of the studies

6: metronidazole resistance is dose-dependent.

7: longer treatments (higher total dose) led to higher rates of AEs.

### **File S1: Results: risk of bias in included studies.**

In the overall comparison 'Eradication proportion of SEQ versus STT', 20 studies [39,43,46,57,62,64,67,68,72,73,75,80,82-84,87,88,90,93,94] were categorized as 'low risk of bias' in all domains of the checklist assessing the quality of the methodology (Figure 2).

Nine studies [59,65,77,79,89,97,100,101,104] were categorized as 'high risk' in the item relating to randomization only. From those, eight [59,77,79,89,97,100,101,104] were rated also as 'high risk' in the item relating to allocation.

Nineteen studies [44,49,54-56,59,71,77-79,81,86,89,96,97,99-101,104] were likewise rated as having poor allocation concealment and were flagged as 'high risk'.

A lack of comprehensive reporting of outcomes, as well as scarcity of information related to the assessed quality items within the aforementioned studies, made both selection and performance biases a threat to the validity of the review (Figure 2 and Figure 3).

However, regardless of the potential biases, the subgroup analyses confirmed a significant gain in the overall ITT eradication proportion with 10-day SEQ compared to STT. Many studies (60%) were reported to be 'truly randomised' (as defined in assessment of risk of bias in included studies) and therefore were unlikely to have been subjected to selection bias due to a lack of randomization through sequence generation.

Performance bias due to a lack of blinding of study participants and personnel could be the domain influencing the review's findings, since over 50% of studies were recorded as not blinded. However, as stated in the assessment of risk of bias in included studies, all studies were classified as 'low risk', given the importance of this finding in the context of *H. pylori* eradication is low, as likewise addressed in the Discussion section.

#### *Allocation*

Nineteen studies [44,49,54-56,59,71,77-79,81,86,89,96,97,99-101,105] were rated as having poor allocation concealment and were flagged as 'high risk'.

Twenty-six (37%) studies reported that allocation was concealed and the remaining ones did not report any information on the allocation of the sequence generation and were therefore flagged as unclear (Figure 2).

In order to generate an unpredictable and unbiased sequence, 24 (35%) studies reported 'adequate' concealment of the allocation sequence, mainly using opaque sealed envelopes and by involving personnel in the enrolment phase that were unaware of the upcoming assignment of participants to treatments.

Albrecht, 2011, reported that the intervention sets were prepared by the hospital's pharmacy and by independent personnel not involved in the study. Similarly, in Kim, 2011, only the independent staff could manage a matching list between study identification number and hospital number, and the data were only revealed to other investigators once recruitment and data collection were completed.

#### *Blinding*

We recorded 54 (78%) studies not preserving masking, as authors reported either that the trial was not blinded, the design of the study was open label or there was no information regarding this domain. In five studies [46,63,69,84,95], the authors stated that only the investigators (but not the participants) were blinded to the treatment allocation, in which case, we reported the studies as single-blinded (Figure 2). All of these studies were, however, classified as 'low risk' (as explained in blinding (performance bias and detection bias)).

The studies by Vaira, 2007 [43], and Albrecht, 2011 [88], were reported to use a 'double-blind' design with placebo during three days after completion of STT. With only two studies reported as double-blinded, we could not conduct the planned subgroup meta-analysis indicated in the protocol. The eradication proportions were 89% and 86% in the SEQ therapy arms and 77% and 69% in the STT therapy arms in Vaira, 2007 [43], and Albrecht, 2011 [88], respectively.

It should nonetheless be noted that the number of studies that were not blinded were due to the design of the SEQ regimen, where usually two drugs were used in the initial phase and three drugs during the second phase of treatment (as PP). Due to the manner in which the drugs were administered, participants could not be easily blinded to their assigned treatment.

### *Incomplete outcome data*

Primary outcomes were correctly and consistently reported in all studies (Figure 3) as PP selection criteria. Attrition bias was reported in five studies [60,65,78,97,101].

Information related to the medical condition at baseline, sex ratio, average age of the population, PP sample size, incidence of AEs or antibiotic resistance were scarcely described in the reports of abstracts of congresses.

In Laving, 2013 [91], data regarding eradication were reported as the number of participants eradicated separately by stool antigen negative and histology negative results. Also, in this same study, the authors did not provide the eradication proportions by ITT analysis, but they could, however, be calculated. In the study by Choi, 2019 [101], the primary outcome was reported as a percentage and has to be also calculated. Additionally, in the later study, the eradication rate in the PP analysis, the compliance rate and adverse effects rate was not reported homogeneously in all treatment arms.

We noted no differences in the number of excluded participants or dropouts between treatment arms across the included studies.

### *Selective reporting*

All studies reported, by treatment arm, the data of the primary outcome.

Thirteen (19%) studies reported *H. pylori* eradication proportions for those patients with bacterial antibiotic resistance: thirteen studies in patients with clarithromycin bacterial resistance; eleven studies in patients with nitroimidazole bacterial resistance; and eight studies in patients with dual bacterial resistance. A selective reporting bias was likely to be associated with this outcome.

### *Other potential sources of bias*

Fifty-seven (83%) studies were in complete article form, indicating no bias was likely due to the publication status.

Studies were of mixed quality. Eradication was evaluated in subgroup analyses and the evidence was further assessed using GRADE. We included these subgroups in which eradication was found to be significantly different among groups or where subgroups were thought to influence *H. pylori* treatment efficacy in the summary of findings Table 1.

We downgraded the quality of the RCT evidence for the following outcomes: publication date (moderate quality), geographic region (low quality) and antibiotic resistance (very low quality). The analyses based on STT length and the adverse event rate were rated as high quality.

## File S2: Detailed search strategies in each of the databases.

### *Search strategies*

EBM Reviews - Cochrane Central Register of Controlled Trials search strategy  
Via OVID platform

1. Helicobacter pylori/
2. pylori.mp. [mp=title, original title, abstract, mesh headings, heading words, keyword]
3. Helicobacter Infections/
4. or/1-3
5. ((triple or standard) adj2 (regimen or therapy or treatment)).tw.
6. (sequential adj2 (regimen or therapy or treatment)).tw.
7. PPI.mp.
8. Proton Pump Inhibitors/
9. (Clarithromycin or biaxin or Claripen or Claridar or clarith or Crixan or Clacid or Fromilid or infex or klaricid or Klabax or Klacid or Vikrol).mp.
10. (amoxicillin or amoxycillin or actimoxi or almodan or amix or amox or amopen or amoram or amoxicot or amoxil or amrit or biomox or clamoxyl or dispermox or galenamox or larotid or moxatag or moxilin or p-hydroxyampicillin or penamox or polymox or respillin or rimoxallin or senox or sumox or Tormoxin or trimox or utimox or wymox or zoxykil).mp.
11. (Alphamox or Amocla or Amoksibos or Amoxiclav Sandoz or Amoxidal or Amoxin or Amoksiklav or Amoxibiotic or Amoxicilina or ApoAmoxi or Augmentin or Bactox or Betalaktam or Cilamox or Curam or Dedoxil or Duomox or E-Mox or Enhancin or Gimalxina or Geramox or Hiconcil or Isimoxin or Klavox or Lamoxy or Moxilen or Moxypen or Moxyvit or Nobactam or Novamoxin or Ospamox or Panklav or Pamoxicillin or Panamox or Samthongcillin or Sinacilin or Tolodina or Yucla or Zerrsox or Zimox).mp.
12. nitroimidazoles/ or metronidazole/ or tinidazole/
13. nitroimidazole\*.tw.
14. (Metronidazole or nabact or clont or danizol or edg dentalgel or elyzol or flagyl or gineflavir or metrocream or metrodzhil or metrogel or metrolotion or metrolol or metronizole or metrotop or metrovex or metrozol or metryl or noritate or norzol or nydamax or obagi or protostat or rozex or satric or trichopol or tricom or trivazol or vandazole or vitazol or zadstat or zidoval).mp.
15. (Tinidazole or bioshik or fasigin or fasigyn\* or tindamax or tricolam).tw.
16. or/5-15
17. 4 and 16

### MEDLINE search strategy

Via OVID platform

1. randomized controlled trial.pt.
2. controlled clinical trial.pt.
3. randomized.ab.
4. placebo.ab.
5. clinical trials as topic.sh.
6. randomly.ab.
7. trial.ti.
8. or/1-7
9. exp animals/ not humans.sh.
10. 8 not 9
11. Helicobacter pylori/
12. pylori.mp. [mp=title, original title, abstract, name of substance word, subject heading word, unique identifier]
13. Helicobacter Infections/
14. or/11-13
15. ((triple or standard) adj2 (regimen or therapy or treatment)).tw.

16. (sequential adj2 (regimen or therapy or treatment)).tw.
17. PPI.mp.
18. Proton Pump Inhibitors/
19. (Clarithromycin or biacin or Claripen or Claridar or clarith or Crixan or Clacid or Fromilid or infex or klaricid or Klabax or Klacid or Vikrol).mp.
20. (amoxicillin or amoxycillin or actimoxi or almodan or amix or amox or amopen or amoram or amoxicot or amoxil or amrit or biomox or clamoxyl or dispermox or galenamox or larotid or moxatag or moxilin or p-hydroxyampicillin or penamox or polymox or respillin or rimoxallin or senox or sumox or Tormoxin or trimox or utimox or wymox or zoxykil).mp.
21. (Alphamox or Amocla or Amoksibos or Amoxiclav Sandoz or Amoxidal or Amoxin or Amoksiklav or Amoxibiotic or Amoxicilina or ApoAmoxi or Augmentin or Bactox or Betalaktam or Cilamox or Curam or Dedoxil or Duomox or E-Mox or Enhancin or Gimalxina or Geramox or Hiconcil or Isimoxin or Klavox or Lamoxy or Moxilen or Moxypen or Moxyvit or Nobactam or Novamoxin or Ospamox or Panklav or Pamoxicillin or Panamox or Samthongcillin or Sinacilin or Tolodina or Yucla or Zerrsox or Zimox).mp.
22. nitroimidazoles/ or metronidazole/ or tinidazole/
23. nitroimidazole\*.tw.
24. (Metronidazole or nabact or clont or danizol or edg dentalgel or elyzol or flagyl or gineflavir or metrocream or metrodzhil or metrogel or metrolotion or metrolyl or metronizole or metrotop or metrovex or metrozol or metryl or noritate or norzol or nydamax or obagi or protostat or rozex or satric or trichopol or tricom or trivazol or vandazole or vitazol or zadstat or zidoval).mp.
25. (Tinidazole or bioshik or fasigin or fasigyn\* or tindamax or tricolam).mp.
26. or/15-25
27. 14 and 26
28. 10 and 27

#### EMBASE search strategy

Via OVID platform

1. Clinical trial/
2. Randomized controlled trial/
3. Randomization/
4. Single-Blind Method/
5. Double-Blind Method/
6. Cross-Over Studies/
7. Random Allocation/
8. Placebo/
9. Randomi?ed controlled trial\$.tw.
10. Rct.tw.
11. Random allocation.tw.
12. Randomly allocated.tw.
13. Allocated randomly.tw.
14. (allocated adj2 random).tw.
15. Single blind\$.tw.
16. Double blind\$.tw.
17. ((treble or triple) adj blind\$).tw.
18. Placebo\$.tw.
19. Prospective study/
20. or/1-19
21. Case study/
22. Case report.tw.
23. Abstract report/ or letter/
24. or/21-23
25. 20 not 24
26. Helicobacter pylori/

27. pylori.mp. [mp=title, abstract, subject headings, heading word, drug trade name, original title, device manufacturer, drug manufacturer]
28. Helicobacter Infections/
29. or/26-28
30. ((triple or standard) adj2 (regimen or therapy or treatment)).tw.
31. (sequential adj2 (regimen or therapy or treatment)).tw.
32. PPI.mp.
33. Proton Pump Inhibitors/
34. (Clarithromycin or biaxin or Claripen or Claridar or clarith or Crixan or Clacid or Fromilid or infex or klaricid or Klabax or Klacid or Vikrol).mp.
35. (amoxicillin or amoxycillin or actimoxi or almodan or amix or amox or amopen or amoram or amoxicot or amoxil or amrit or biomox or clamoxyl or dispermox or galenamox or larotid or moxatag or moxilin or p-hydroxyampicillin or penamox or polymox or respillin or rimoxallin or senox or sumox or Tormoxin or trimox or utimox or wymox or zoxydil).mp.
36. (Alphamox or Amocla or Amoksibos or Amoxiclav Sandoz or Amoxidal or Amoxin or Amoksiklav or Amoxibiotic or Amoxicilina or ApoAmoxi or Augmentin or Bactox or Betalaktam or Cilamox or Curam or Dedoxil or Duomox or E-Mox or Enhancin or Gimalxina or Geramox or Hiconcil or Isimoxin or Klavox or Lamoxy or Moxilen or Moxypen or Moxyvit or Nobactam or Novamoxin or Ospamox or Panklav or Pamoxicillin or Panamox or Samthongcillin or Sinacilin or Tolodina or Yucla or Zerrsox or Zimox).mp.
37. nitroimidazoles/ or metronidazole/ or tinidazole/
38. nitroimidazole\*.tw.
39. (Metronidazole or nabact or clont or danizol or edg dentalgel or elyzol or flagyl or gineflavir or metrocream or metrodzhil or metrogel or metrolotion or metrolyl or metronizole or metrotop or metrovex or metrozol or metryl or noritate or norzol or nydamax or obagi or protostat or rozex or satric or trichopol or tricom or trivazol or vandazole or vitazol or zadstat or zidoval).mp.
40. (Tinidazole or bioshik or fasigin or fasigyn\* or tindamax or tricolam).tw.
41. or/30-40
42. 29 and 41
43. 25 and 42

#### CINAHL search strategy

Via OVID platform

S12 (S1 and S11)

S11 S2 or S3 or S4 or S5 or S6 or S7 or S8 or S9 or S10

S10 Tinidazole

S9 Metronidazole

S8 nitroimidazole\*

S7 amoxicillin

S6 Clarithromycin

S5 Proton Pump Inhibitors

S4 PPI

S3 sequential and ( (regimen or therapy or treatment) )

S2 ( (triple or standard) ) and ( (regimen or therapy or treatment) )

S1 Helicobacter pylori



## **File S3: Methods: risk of bias assessment**

### **Items evaluated in the Risk of Bias assessment**

- Random sequence generation;
- Allocation concealment;
- Blinding of participants and personnel;
- Blinding of outcome assessment;
- Incomplete outcome data (attrition bias);
- Selective outcome reporting (reporting bias).

#### *Generation of the treatment allocation*

We considered a study to be a RCT if it was explicitly described as 'randomised'. This should include the use of words such as 'randomly', 'random' or 'randomisation'. We then rated the randomized trial as truly random, pseudo-random, non-random, not stated or unclear.

We defined a trial as 'truly random' if the allocation sequence was computer-generated or generated by a random number table, coin toss, shuffles or throwing dice. The person involved in the recruitment of participants should not be the one performing the procedure.

If the selection was based on patient hospital numbers, birth dates, visit dates, alternate allocation or other methods not involving a defined random mechanism but likely to produce an unpredictable sequence of numbers, we considered the trial to be 'pseudo random'.

We excluded studies in which the selection was based on participant or clinical preference, or any selection mechanism that could not be described as random. We also excluded studies that did not state whether the treatment was randomly allocated.

We classified studies which were identified as randomized trials, but which did not describe how the treatment allocation was generated, as having an 'unclear' generation of treatment allocation.

#### *Concealment of the treatment allocation at randomization*

A study was classified as concealed, unconcealed or unclear in the following situations [148].

We rated a study 'concealed' if the trial investigators were unaware of the allocation of each participant before they were entered into the trial. Adequate methods included central telephone randomization schemes, pharmacy-based schemes, sequentially numbered, opaque, sealed envelopes, sealed envelopes from a closed bag or the use of numbered or coded bottles or containers.

We rated the allocation as 'unconcealed' when trial investigators were aware of the allocation of each participant before they entered the trial. For example, when it was based on participant data, such as the date of birth or hospital case note number, visit dates, sealed envelopes that were not opaque or a random number table that was not concealed from the investigator.

If authors did not report or provide a description of an allocation concealment approach that allowed for classification as concealed or not concealed, then we categorized the study as 'unclear allocation concealment'.

#### *Implementation of masking*

A trial could be considered double-blinded, single-blinded, not blinded or unclear and was to be classified within a 'Risk of bias' table into one of three categories: low risk, unclear risk and high risk [134].

We judged a study as 'not blinded' if the authors defined it as an open-label study, or no information was provided.

If a trial was simply described as 'single-blind', we recorded the degree of masking as not explicitly reported for clinician and outcome assessor, while participants were presumed to be blinded.

If a trial was reported as 'double-blind', we understood masking was performed at all levels. Double-blinding, however, was unlikely, as the type of treatment

administration could not easily allow for the simultaneous blinding of the clinician, the pharmacist, the participant and ultimately the outcome assessor.

In the context of studies evaluating *H. pylori* eradication treatments, the item blinding of participants and personnel was classified as 'low risk' in all included studies (independently if they were open-labeled, single- or double-blinded), as the implementation of masking at this level has no effect on the result of the eradication treatment (i.e., either success or failure).

On the other hand, the item blinding of outcome assessment was classified as 'low risk' in all included studies as well, given it was assumed that blinding during the evaluation (reading) of the outcome result (of the diagnostic method) would not alter the result of the test (i.e., *H. pylori* positive or negative). In the current therapeutic context, the result of the diagnostic method used to confirm *H. pylori* eradication is usually assessed either by a machine (in this case, for instance, the urea breath test and the stool antigen test) or by a pathologist (i.e., the study of a gastric biopsy through histology) who is usually unaware of the treatment assignment or any other test result.

#### **File S4. Quality of the body of evidence (GRADE methodology)**

We assessed the quality of the body of the evidence using GRADE methodology in those subgroup analyses where we found statistically significant differences between treatments for the main outcome.

We have incorporated these outcomes into the 'Summary of findings table' (Table S2) for the SEQ versus STT comparison. We present GRADE quality assessments ranging from 'very low' to 'high' quality evidence, alongside the effect estimates and decisions made relating to the downgrading (or upgrading) of evidence.

The GRADE approach uses five considerations, study limitations, consistency of effect, imprecision, indirectness and publication bias, to assess the quality of the body of evidence for each outcome. The evidence was downgraded from 'high quality' by one level for serious (or by two levels for very serious) limitations, depending on assessments of risk of bias, indirectness of evidence, serious inconsistency, imprecision of effect estimates or potential publication bias.

#### *Sensitivity analysis*

No arbitrary inclusion or exclusion criteria were established for the search strategy. If during the review process we identified sensitivity issues (missing data or individual peculiarities of the studies), we repeated the meta-analysis to test for differences. We conducted sensitivity analyses to test the robustness of the review, using a random effects model instead of a fixed-effect model; excluding trials with no or unclear allocation concealment; and excluding trials where the method of randomization was unclear.

#### *Summary of findings and assessment of the certainty of the evidence*

We used the GRADE approach which evaluates the following four levels, study limitations (risk of bias), inconsistency, imprecision, indirectness and publication bias (or other concerns) to assess the certainty of the evidence [149]. Two review authors (OPN and BM) independently made judgements regarding the certainty of evidence. A third review author (JPG) checked these judgements, and disagreements were resolved by consensus.

A summary of findings (SoF) table (Table S2) was created using GRADEpro GDT for the main comparisons that could potentially affect the main outcome (eradication): overall eradication rate, geographic region, publication date, STT different durations, bacterial antibiotic resistance and AEs.

The certainty of the body of the evidence was downgraded using the recommendations described in the *Cochrane Handbook for Systematic Reviews of Interventions*. The GRADE approach interprets the four aforementioned levels of certainty as follows:

- High certainty: we are very confident that the true effect lies close to that of the estimate of the effect.
- Moderate certainty: we are moderately confident in the effect estimate; the true effect is likely to be close to the estimate of the effect, but there is a possibility that it is substantially different.
- Low certainty: our confidence in the effect estimate is limited; the true effect may be substantially different from the estimate of the effect.
- Very low certainty: we have very little confidence in the effect estimate; the true effect is likely to be substantially different from the estimate of effect.

The decisions taken to downgrade the certainty of evidence in each outcome evaluated were detailed in the footnotes of the SoF table (Table S1).
